1 Title:

2 **Warm nights disrupt global transcriptional rhythms in field-grown rice panicles**

3

4

5 **Jigar S. Desai<sup>a</sup>, Lovely Mae F. Lawas<sup>b,c</sup>, Ashlee M. Valente<sup>d</sup>, Adam R. Leman<sup>d</sup>, Dmitry O.**

6 **Grinevich<sup>a</sup>, S.V. Krishna Jagadish<sup>b,e</sup>, and Colleen J. Doherty<sup>a</sup>**

7 ORCID:

8 Jigar S. Desai ORCID ID 0000-0002-5238-3619

9 Lovely Mae F. Lawas ORCID ID 0000-0001-9141-1304

10 Adam R. Leman ORCID ID 000-0001-9274-8224

11 Dmitry O. Grinevich ORCID ID 0000-0003-2645-1929

12 S.V. Krishna Jagadish ORCID ID 0000-0002-1501-0960

13 Colleen J. Doherty ORCID ID 0000-0003-1126-5592

14

15 <sup>a</sup> Department of Molecular and Structural Biochemistry, North Carolina State University, Raleigh, NC

16 27695, USA

17 <sup>b</sup> International Rice Research Institute, DAPO Box 7777, Metro Manila, Philippines

18 <sup>c</sup> Max Planck Institute of Molecular Plant Physiology, D-14476 Potsdam, Germany

19 <sup>d</sup> Mimetics LLC, Durham, NC, 27709, USA

20 <sup>e</sup> Department of Agronomy, Kansas State University, Manhattan, KS 66506, USA

21 Corresponding author

22 Colleen J. Doherty

23 North Carolina State University

24 120 Broughton Dr. CB7622

25 Raleigh, NC 27695-7622

26 919.515.5802

27 colleen\_doherty@ncsu.edu

28

29

30

31

32

33 **ABSTRACT**

34 In rice, a small increase in nighttime temperatures reduces grain yield and quality. How warm nighttime  
35 temperatures (**WNT**) produce these detrimental effects is not well understood, especially in field conditions  
36 where the normal day to night temperature fluctuation exceeds the mild increase in nighttime temperature.  
37 We observed genome-wide disruption of gene expression timing during the reproductive phase on field-  
38 grown rice panicles acclimated to 2-3°C WNT. Rhythmically expressed transcripts were more sensitive to  
39 WNT than non-rhythmic transcripts. The system-wide transcriptional perturbations suggest that WNT  
40 disrupts the tight temporal coordination between internal molecular events and the environment resulting  
41 in reduced productivity. We identified transcriptional regulators whose predicted targets are enriched for  
42 sensitivity to WNT. The affected transcripts and candidate regulators identified through our network  
43 analysis explain molecular mechanisms driving sensitivity to WNT and candidates that can be targeted to  
44 enhance tolerance to WNT.

45

46 **KEYWORDS:** climate change impact, global food security, nighttime temperature increase, circadian  
47 regulators, diel transcriptional networks, rhythmic expression, rice panicles

48

49

## 50 INTRODUCTION

51 Global climate models predict with high certainty that mean surface temperatures will increase by 1° to 4°C  
52 by 2100<sup>1-3</sup>. A breakdown of these temperature trends highlights a more rapid increase in minimum  
53 nighttime temperature compared to the maximum daytime temperature at the global<sup>1</sup>, regional<sup>4</sup>, and farm<sup>5,6</sup>  
54 scales. In contrast to the short duration heat-spikes predicted with the increasing daytime temperatures, the  
55 duration of warmer nighttime temperatures (**WNT**) is expected to increase; impacting important growth  
56 and developmental phases of crops<sup>7</sup>. In response to increased daytime temperatures, rice plants employ  
57 mechanisms to minimize heat-induced damage such as avoidance through transpiration cooling<sup>8</sup>, escape  
58 through early morning flowering<sup>9</sup>, and reproductive resilience<sup>10</sup>. In contrast, there is limited plasticity in  
59 domesticated rice plants to overcome the impacts of increasing nighttime temperature<sup>7</sup>. The negative  
60 impacts of WNT on rice yield and quality have been documented across controlled environments<sup>11,12</sup> and  
61 field conditions<sup>13,14</sup>, demonstrating the potential to induce substantial economic losses<sup>15</sup>. The limited  
62 physiological capacity and the larger spatial scales of the predicted increase in nighttime temperatures  
63 compared to location-specific daytime temperature increases<sup>7</sup> suggest that the economic losses under  
64 current and future warmer nights pose a severe threat to sustaining global rice production.

65 The physiological responses in rice to high nighttime temperatures include a significant reduction  
66 in pollen viability, increased spikelet sterility, and membrane damage leading to yield losses<sup>11,16-18</sup>.  
67 However, these investigations imposed temperatures that are significantly higher than future predictions.  
68 Thus, a knowledge gap exists between rice responses in controlled chambers and real-world conditions. A  
69 series of studies using field-based heat tents demonstrated the difference between chamber and field  
70 studies<sup>7,13,19-21</sup>. These field-based studies identify higher night respiration during post-flowering as a critical  
71 factor determining yield and quality losses due to high nighttime temperature<sup>20</sup>. Although the relationship  
72 between night respiration and sugar metabolism enzymes has been documented, particularly during the  
73 grain-filling stage<sup>20</sup>, the mechanistic changes are yet to be investigated.

74 In the field, environmental conditions change dynamically. This variation is not captured by  
75 controlled environments and only partially by the field-based heat tents. Previous observations indicate that  
76 the environmental variability of natural field conditions plays an essential role in regulating transcriptional  
77 responses and contributes to the stability of the circadian clock in rice<sup>22</sup>. Extensive studies in *Arabidopsis*  
78 have demonstrated that plant responses to abiotic stress are dynamic throughout the day<sup>23-38</sup> supporting the  
79 need to capture stress responses at multiple time points to provide a comprehensive mechanistic  
80 understanding of rice exposed to WNT. Examination of the temporal mechanistic responses to stress in  
81 crops under field conditions is generally lacking and is the primary motivation driving our investigations.

82 The circadian clock temporally coordinates the molecular activities with the surrounding  
83 environment<sup>39,40</sup>. The clock is sensitive to subtle changes in the environment to ensure an organism is ‘in-

84 tune' with the surroundings<sup>41</sup>. WNT may disrupt this environmental coordination. In rice and Arabidopsis,  
85 daily rhythms of temperature, also known as thermocycles, entrain the circadian clock and control the  
86 rhythmic expression of a portion of the transcriptome<sup>42-44</sup>. In Arabidopsis, the photoreceptor PHYB  
87 connects changes in ambient temperature to the circadian clock<sup>45-47</sup> and changes in ambient temperatures  
88 affect the expression of the core circadian components<sup>48</sup>. Although these studies indicate possible  
89 mechanisms for how plants sense temperature changes, it is still not clear how the daily temperature range  
90 is perceived and integrated into the circadian clock. Moreover, the significance of a thermocycle sensitive  
91 clock, the impacts of altering the daily temperature cycles, and the effects on the expression of these  
92 temperature-responsive rhythms, particularly under field conditions, remain to be characterized. Under  
93 WNT, the daily thermocycle amplitude is reduced and could impact the expression of thermocycle-  
94 regulated transcripts.

95 In order to fill the significant knowledge gap on the molecular responses inducing yield losses in  
96 field conditions under WNT, we investigated how WNT, at levels in-line with the Intergovernmental Panel  
97 on Climate Change (IPCC) predictions, affect the genome-wide expression patterns in the panicles of rice  
98 grown under field conditions. Specific objectives of our study were to (i) quantify the diurnal  
99 reprogramming of the rice panicle transcriptome under WNT; (ii) identify major interacting molecular  
100 pathways that determine rice response to WNT and (iii) find regulators of transcriptionally responsive genes  
101 under WNT.

102

## 103 RESULTS

### 104 WNT NEGATIVELY IMPACT BIOMASS AND YIELD

105

106 IR64, a popular high-yielding rice variety, was grown under normal nighttime temperatures (NNT) or under  
107 warm nighttime temperatures (WNT), using a field-based infrared ceramic heating system (Fig. S1). WNT  
108 treatment started at panicle initiation and continued through maturity. At 50% flowering, field-grown rice  
109 panicles were collected for transcriptional analysis throughout the 24h cycle. WNT maintained a 2-3°C  
110 increase in temperature in the 12h night period (1800—0600h) compared to ambient temperature (Fig.  
111 S1). As previously reported<sup>5,14</sup>, we observed a 12.5% decrease in the grain yield of IR64 under WNT  
112 (Kruskal-Wallis test  $p$ -value <0.05, Fig. 1). Total aboveground biomass ( $p$ -value <0.05), number of  
113 spikelets per panicle ( $p$ -value <0.05), and 1000-grain weight ( $p$ -value <0.05) were also significantly  
114 affected by WNT (Fig. 1, Dataset S1). Panicles per m<sup>2</sup>, and spikelet fertility did not change significantly  
115 with WNT (Supplemental Table 1).

116

### 117 WNT IMPACTS TRANSCRIPTION PATTERNS DURING THE DAY

118 To evaluate the molecular changes associated with the observed agronomic changes in plants grown under  
119 WNT, samples were collected at multiple time points throughout the day. We performed RNA-Seq on  
120 panicles at the 50% flowering stage. A total of 1110 genes were identified as differentially expressed genes  
121 (DEGs) between WNT and NNT (adjusted  $p$ -value < 0.05 and log fold change > 0.5), corresponding to 6%  
122 of the 15,213 reliably detectable genes (Fig. 2, Supplemental Table 2). In response to WNT, 415 genes  
123 were upregulated and 695 genes were downregulated (Fig. 2A and B). The majority of the 415 DEGs that  
124 were upregulated were identified from the daytime samples, while significantly downregulated genes were  
125 more often detected in the nighttime. The expression of all detectable genes is available at  
126 [https://go.ncsu.edu/clockworkviridi\\_wnt](https://go.ncsu.edu/clockworkviridi_wnt).

127 The time of sampling greatly influences the identification of DEGs. The time point with the most  
128 DEGs was 1h before dawn, just before the WNT treatment ceased each day (396 DEGs, time point  
129 23h). Only 12 DEGs were identified at dusk, the time point at which the WNT treatment was initiated. Even  
130 though the increased temperature was applied only from dusk until dawn, many genes were identified as  
131 DEGs in the samples taken during the day, when the conditions were identical between WNT and NNT.  
132 An eigengene representing the expression pattern of all genes induced at any time point by WNT highlights  
133 that the upregulated genes under WNT tend to show cyclic expression with a peak during the day in NNT.  
134 The timing of this peak in expression is altered by WNT (Fig. 2C). Functional enrichment of genes  
135 upregulated by WNT at any time point included MapMan<sup>49</sup> terms enriched for protein posttranslational  
136 modification, signaling, carbohydrate metabolism, RNA processing, and kaurene synthesis (Fig. S4A).  
137 However, each time point presents a unique DEG profile and enriched functional categories (Supplemental  
138 Table 3). In part, this appears to be due to the underlying variation in expression in the control samples. For  
139 example, during the morning hours when photosynthetic genes are active, DEGs were enriched for  
140 photosynthesis-related activity, while at night no difference in expression was detected, likely due to their  
141 low value in control conditions at those time points. Therefore, sampling at only one time point would miss  
142 the impacts of WNT on molecular functions not active at that time. In fact, most of the 695 downregulated  
143 genes are identified during the nighttime. An eigengene representing the overall downregulated cohort  
144 indicates that under NNT, the majority of these transcripts peak just before dawn. In WNT, these genes  
145 have an overall lower amplitude of expression and an advance in the phase of peak expression (Fig. 2D).  
146 Downregulated genes were enriched for protein folding, photosynthesis, and heat stress (Fig. S4B).

147

## 148 **DEGs ARE ENRICHED FOR RHYTHMICALLY EXPRESSED AND CIRCADIAN-** 149 **CONTROLLED GENES**

150 The observation that many DEGs show an overall change in the pattern of expression throughout the day  
151 (e.g., Fig. 2), and our hypothesis that the WNT disrupt the circadian clock, led us to speculate that the

152 rhythmically expressed and circadian-regulated genes may have enhanced sensitivity to WNT. We  
153 evaluated if the DEGs in WNT are enriched for rice genes identified as rhythmically expressed in a previous  
154 study in controlled conditions by Filichkin et al.<sup>44</sup>. we observed significant overlap between transcripts we  
155 identified as DEGs in WNT and genes identified as rhythmic when grown in both photocycles and  
156 thermocycles (Fig. 3A). DEGs in WNT are under-represented for non-cycling genes in photocycles and  
157 thermocycles ( $p$ -value  $< 2.93e^{-30}$ ). The WNT DEGs were enriched for genes with a peak expression at night,  
158 between Zeitgeber times (ZT) 12-21h (Fig. 3A). Genes with peak expression at ZT19 (6h after dusk)  
159 showed the strongest enrichment for DEGs in WNT, ( $p$ -value  $< 8.55e^{-5}$ ). For example, *LOC\_Os10g41550*  
160 is beta-amylase with rhythmic expression peaking just before dawn in the chamber-grown Nipponbare rice  
161 seedlings (Fig. 3B). We observe a similar peak in expression just before dawn in the corresponding gene,  
162 *MH10t0431700*, in our field-grown IR64 panicles in NNT. However, in WNT, the expression pattern is  
163 delayed, with a peak expression at dawn in WNT, when expression levels are already decreasing in NNT.  
164 The 24h expression pattern of beta-amylase in seedlings grown in photocycles and thermocycles has a  
165 higher correlation to NNT (0.95) than WNT (0.62). WNT DEGs are also overrepresented in transcripts  
166 rhythmically expressed in seedlings grown in only photocycles (Fig. 3C) or thermocycles (Fig. 3D).

167 In addition to rhythmic expression in the presence of photocycles or thermocycles, the WNT DEGs  
168 were also enriched for circadian-regulated genes with thermocycle-entrained expression. We considered  
169 genes to be circadian-regulated if the rhythmic expression persisted in constant conditions after entrainment  
170 in Filichkin et al.<sup>44</sup>. The genes identified as DEGs in WNT showed enrichment for circadian-regulation  
171 only when compared to transcripts entrained in the presence of thermocycles. After entrainment with either  
172 thermocycles alone, or with both photocycles and thermocycles, WNT DEGs were enriched in the genes  
173 that maintained a rhythmic expression pattern when released to constant conditions ( $p$ -value  $< 0.05$ ) (Fig.  
174 3E, F). However, WNT DEGs were not enriched for in the transcripts that showed circadian regulation after  
175 entrainment with photocycles alone (Fig. 3G) indicating that WNT DEGs are enriched for genes under  
176 control of the thermocycle clock based on the data in Filichkin et al.<sup>44</sup>. For example, *LOC\_Os10g41550*  
177 (the beta-amylase in Fig. 3B) is rhythmically expressed when entrained by thermocycles alone, but not by  
178 photocycles alone.

179

## 180 **WNT ALTERS TEMPORAL EXPRESSION PATTERNS**

181 The enrichment of the WNT DEGs for genes previously identified as rhythmic in diel and circadian  
182 conditions suggests that WNT potentially disrupts the overall rhythmic expression of transcripts throughout  
183 the day. Therefore, we evaluated the rhythmicity of expression for all 15,213 detectible transcripts, even  
184 those not identified as DEG, in NNT and WNT grown samples. All transcripts were categorized as rhythmic

185 or not rhythmic in these diel conditions using JTK cycle<sup>50</sup> ( $q$ -value of  $<6.61e-15$ , Fig. 4A). The period  
186 of rhythmically expressed genes was similar in both NNT and WNT (Fig. S5).

187 We identified genes that were uniquely rhythmic in either NNT or WNT. Of the 6248 genes that  
188 cycled in NNT, 2136 genes lost rhythmicity in WNT (34%, Fig. 4B, Supplemental Table 4). The average  
189  $q$ -value is  $1.57e-16$  in NNT; indicating that the genes that are losing rhythmicity in WNT were confidently  
190 identified as rhythmic in NNT (Fig. 4C). Genes that lost rhythmicity in WNT were enriched for heat  
191 response, protein folding, and amino acid metabolism (Supplemental Table 5). There were 1673 genes that  
192 were rhythmic only in WNT conditions (Supplemental Table 4). These genes that gained rhythmicity in  
193 WNT were enriched for DNA synthesis and chromatin structure, protein posttranslational modification,  
194 amino acid metabolism, cell wall synthesis, secondary metabolism, fatty acid metabolism, and cell cycle  
195 (Supplemental Table 5).

196

## 197 **WNT ALTERS THE PATTERN OF EXPRESSION OF GENES CLASSIFIED AS RHYTHMIC** 198 **IN BOTH CONDITIONS**

199 Even for genes that maintain a rhythmic pattern of expression in both NNT and WNT (66%, 4112 genes),  
200 the phase of expression may differ between the two conditions. As previously reported for chamber-grown  
201 plants, we observe a bimodal distribution of genes with peak primarily at dawn or dusk in NNT conditions  
202 (Fig. 4A)<sup>43,44,51</sup>. We classified genes as either morning phased (peaks at Dawn,) or evening phased (peaks  
203 at Dusk). In NNT conditions, the distribution between morning and evening phase was relatively equal  
204 (ratio of morning to evening phased genes = 0.94, Fig. 4D). However, in WNT this distribution is disrupted  
205 and there is an increase in the ratio of morning to evening phased genes (ratio = 1.58, Fig. 4D). The time  
206 of the maximum expression differs between WNT and NNT for 16.5% of the genes that maintain a rhythmic  
207 expression pattern in both conditions (Fig. 4E-H). WNT resulted in both delayed (Fig. 4F, H) and advanced  
208 (Fig. 4G) expression. This shift in peak expression is observed more often in select time points. More than  
209 50% of the genes that in NNT peak at Dawn, 10.5h, 12h, 17.5h or 23h, have a shifted peak of expression  
210 in WNT. For example, *MH03g0450600*, a chlorophyll a/b binding protein, peaks in expression in NNT at  
211 3.5h after dawn, but is delayed to 7h in WNT (Fig. 4F). Functional enrichment of all the genes with a similar  
212 delay in peak expression from 3.5h in NNT to 7h in WNT shows that this change in phase affects  
213 components of the photosynthetic machinery (Fig. 4F). Genes that peak just prior to dawn at 23h show an  
214 advance in their peak of expression in WNT. *MH07g0175300*, also known as OsNramp5, a metal  
215 transporter associated with disease resistance, peaks in expression at 17.5h in NNT but at 14h in WNT (Fig.  
216 4G). This group of genes is functionally enriched with processes involved in biotic stress, protein  
217 phosphorylation, and RNA splicing (Fig. 4G). The expression of *MH12g0102300*, a GDP-L-galactose  
218 phosphorylase, peaks at 23h in NNT and plateaus in the early daytime hours. In WNT higher expression of

219 *MH12g0102300* persists into the daytime hours changing the peak timing of expression (Fig. 4H). Genes  
220 with a similar disruption that delayed peak expression from 23h to Dawn in WNT were enriched for  
221 carbohydrate and fatty acid metabolism (Fig. 4H).

222 Many of the WNT DEGs showed a shift in their peak phase of expression (Fig. 4I). Genes that  
223 peaked during the daytime hours in NNT showed a smaller change in the timing of the peak expression  
224 compared to genes that peak after dusk in NNT, suggesting that the DEG calls may be due to the change in  
225 pattern of expression at night. Genes that peak in NNT after ZT12 showed a stronger effect, consistent with  
226 our previous observation of more DEGs post ZT12 (Fig. 2B), higher enrichment of rhythmically expressed  
227 transcripts in the nighttime period (Fig. 3A), and more genes that lose cycling after ZT12 (Fig. 4B).

228

## 229 IDENTIFYING REGULATORS OF WNT PERTURBED TARGETS

230 To identify transcriptional regulators of WNT DEGs, we used two approaches in parallel (Fig. 5A). First  
231 we independently constructed a regulatory network from publicly available transcriptome data (External  
232 Data Network<sup>52</sup>). We constructed a second network only from our time course data (Internal Data Network).  
233 For the external data source we selected 555 Nipponbare microarray samples from Nagano et al.<sup>52</sup>, a dataset  
234 of field-grown rice samples with an emphasis on the time of day variation. Using sequential samples, we  
235 employed ExRANGES<sup>53</sup> and GENIE3<sup>54</sup> to construct a gene regulatory network, identifying the candidate  
236 targets of 1196 transcription factors (TFs) (Supplemental Table 7)<sup>52</sup>.

237 Prior to evaluating the impacts of WNT on this network, we first established a confidence threshold  
238 for the TF target predictions and validated our network. We analyzed the overlap of the predicted TF targets  
239 with experimental Chip-Seq and binding motif data. Since few ChIP-Seq experiments in rice are available,  
240 we compared our identified targets with Arabidopsis ChIP-Seq experiments. In Arabidopsis, *AtPIF4*  
241 *AtPIF4*<sup>55</sup> and *AtCCA1*<sup>56</sup> ChIP-Seq data are available and prior work indicates that these Arabidopsis genes  
242 may be the functional orthologs of *OsPIF1* and *OsLHY* respectively<sup>57,58</sup>. We used orthologs identified  
243 between the rice variety MH63 and Arabidopsis<sup>59</sup> to perform this cross-species comparison. We examined  
244 the enrichment of orthologs of ChIP-Seq targets for both Arabidopsis TFs to the predicted targets for the  
245 homologs of these two TFs in our rice network. The 500bp upstream promoter region of the *OsPIF1*  
246 predicted targets is enriched for the cis-regulatory motif CACGTG, which is consistent with the known  
247 *AtPIF4* binding site (HOMER's binomial cumulative distribution<sup>60</sup> test  $p$ -value  $< 1E^{-4}$ ). Additionally, 26 of  
248 the 110 predicted targets for *OsPIF1* overlapped with the Arabidopsis *AtPIF4* ChIP-Seq targets ( $p$ -value  $<$   
249 0.05). The predicted targets of *OsLHY*-chr8, were enriched for AAATATCT, which is also consistent with  
250 the known evening element binding site for *AtCCA1* (HOMER's binomial cumulative distribution<sup>60</sup> test  $p$ -  
251 value  $< 1E^{-7}$ ). We found that 24 out of the 108 predicted targets overlapped with *AtCCA1* ChIP-Seq targets



252 ( $p$ -value < 0.05). The enrichment of our network for known targets and cis-regulatory motifs even across  
253 species, gives us confidence in the targets identified for each TF.

254 We identified the TF regulators whose targets, predicted from this external data set, had disrupted  
255 expression under WNT. TFs with targets that were enriched for WNT DEGs were considered regulators of  
256 WNT sensitive genes. The targets of 25 TFs were enriched for WNT DEGs ( $p$ -value cutoff < 0.01) (Fig.  
257 5B). Most of these predicted regulators of WNT sensitive targets had a strong cyclic pattern of expression  
258 (JTK  $Q$ -value <  $6E^{-15}$ ) and many were related circadian clock components (Fig. 5C). Of the TF regulators  
259 with high expression in panicle tissue, 35 target genes were shared between at least two TFs and 43 target  
260 genes have only one TF. Many of the target genes are related to photosynthesis and carbohydrate  
261 metabolism (Fig. 5D). Thirty of the 78 targets of these predicted regulators of WNT sensitive transcripts  
262 continue to cycle in constant conditions after entrainment in thermocycles alone (PHASER<sup>56</sup>  $p$ -value <  
263 0.01) indicating the target genes are enriched for thermocycle-entrained genes. A distinct pattern of TF and  
264 target grouping was apparent for the targets predicted to be regulated by more than one of these top  
265 candidate TFs (Fig. 5D). Group 1 consisted of targets regulated by Zf-CCH54, EDH4, and bZIP71, Group  
266 2 consisted of targets regulated by bZIP1, PRR95, CXC2, BBX24, PIF1, ZEP1, and DOF2, and Group 3  
267 targets had regulators from both groups. Homologs of many of the Group 2 regulators and targets have been  
268 previously associated with the circadian clock in Arabidopsis. For example, *MH03g0287000*, a Group 2  
269 target which has sequence similarity to LNK1 in Arabidopsis, a known thermocycle-regulated clock  
270 component<sup>61</sup>. Of note, the Arabidopsis homolog of *OsPIF1*, *AtPIF3*, has been previously identified as  
271 thermo-responsive<sup>63,64</sup>. *AtPRR7* and *AtPRR9*, the same family as *OsPRR95*, are regulators of temperature  
272 compensation<sup>65</sup>. *BBX24* has been associated with circadian regulation<sup>62-64</sup>. Consistent with our  
273 observations of the altered rhythmicity of the transcripts themselves, the predicted regulators of the genes  
274 with expression altered by WNT suggest a link between the circadian clock and the observed altered  
275 expression under WNT.

276

## 277 NETWORKS OF TRANSCRIPTIONAL RESPONSES ARE ALTERED IN WNT

278 Our Internal Data Network approach identified regulatory edges from the NNT and WNT expression data  
279 independently, based on<sup>65</sup>. This approach leverages the time series gene expression data and kinetic models  
280 of transcription regulation to estimate likelihood of TF regulation of other TFs (TF-TF). The results enable  
281 a direct comparison between the NNT and WNT constructed networks.

282 Of the 368 TFs that had regulators predicated with high confidence (TREP <= 3, BE<=0.25), the  
283 regulators of 89 of these TFs were perturbed by WNT. The perturbed network edges spanned the entire  
284 circadian cycle. TF-TF interaction of known circadian regulators also change based on the expression  
285 differences in NNT and WNT (Fig 6). For example, 17.5h after dawn four circadian TFs are expressed in

286 NNT conditions, but in WNT there are no circadian TFs that peak at this time in the network (Fig. 6).  
287 Consistent with the External Network approach, BBX24 and PIF1 were identified as regulators with targets  
288 that have altered expression under WNT. However, regulators not present in the microarray-based Nagano  
289 et al.<sup>52</sup> study can be detected in this Internal Data Network because the networks were generated directly  
290 from our Indica RNA-Seq data. For example, MH06g0689300, a Squamosa promoter binding protein-like  
291 (SPL) family member is identified in the Internal Data Network as a regulator of WNT DEGs, but is not on  
292 the rice microarray used by Nagano et al.<sup>52</sup>. Consistent with TFs identified as regulators of WNT DEGs  
293 from the External Data Network and the observed effects on patterns of gene expression, this analysis  
294 indicates that WNT may impact the functioning of the circadian clock in panicle tissue.

295

## 296 **VALIDATING TARGETS OF TFs THAT RESPOND TO INCREASING NIGHTTIME** 297 **TEMPERATURE**

298 Two independent network approaches identified overlapping regulators of WNT sensitive gene expression.  
299 Of the thirteen top regulators identified using the External Data Network that were also tested in the Internal  
300 Data Network, six were identified as regulators of WNT sensitive targets in both networks (Fig. 7A,  
301 Supplemental Table 8.)

302 To evaluate the predicted regulators of WNT sensitive transcripts, we grew IR64 rice in field-based  
303 tents<sup>13,14</sup>, where we could generate a gradient of night time temperatures (24°C, 26°C, 28°C or 30°C). We  
304 performed RNA-Seq from panicle tissue of plants grown in each of these night temperatures collected at  
305 the dawn and dusk time points. We examined the effect of this gradient of nighttime temperatures on the  
306 expression of the TFs and their predicted targets (Fig. 7B-D). Of the TFs predicted to regulate WNT DEGs,  
307 the expression of PIF1, PRR95, BBX24, SPL, and DOF2 TFs themselves responded to increasing nighttime  
308 temperatures (Fig 7, Fig. S6). For example, PIF1 expression is significantly reduced at dawn under 28°C  
309 and 30°C nighttime temperature conditions (Fig. 7B). At dusk, PIF1 is not expressed. Activated targets of  
310 PIF1 positively correlated with PIF1 expression at dawn ( $r = 0.96$ ) with significantly reduced expression at  
311 28°C and 30°C. Repressed targets of PIF1 negatively correlated with PIF1 expression ( $r = -0.79$ ) at dawn  
312 and had significantly increased expression at 30°C. The correlation between PIF1 expression levels and the  
313 PIF1 targets predicted using the External Network that are also WNT DEGs is high for both activated  
314 targets ( $r = 0.97$ ) and PIF1 repressed targets ( $r = -0.98$ ) (Supplemental Table 9). In contrast to PIF1, PRR95  
315 is only expressed at dusk and is differentially expressed at 26°C, 28°C, and 30°C (Fig. 7C). Targets  
316 predicted to be activated by PRR95 at dusk positively correlated with PRR95 expression ( $r = 0.96$ ) and  
317 significantly increase expression in the increasing nighttime temperatures. At the dusk time point, targets  
318 predicted to be repressed by PRR95 correlated negatively with PRR95 expression ( $r = -0.92$ ) and their  
319 expression was reduced under increasing nighttime temperatures. The predicted PRR95 Targets that are

320 WNT DEGs are highly correlated with PRR95 expression at dusk (activated  $r = 0.94$ , repressed  $t = -0.87$ ,  
321 Fig. 7C, Supplemental Table 2). The targets predicted to be activated by SPL, identified only in the Internal  
322 Data Network since it is not on the microarray, are also correlated with SPL expression both in dawn and  
323 dusk in the gradient experiment (dawn  $r = 0.85$ , dusk  $r = 0.99$ , Fig. 7D). The expression of the TFs predicted  
324 to regulate WNT sensitive targets showed  $> 0.7$  absolute correlation value with their predicted targets, even  
325 though these targets were derived from a dataset not testing WNT<sup>52</sup> (Figs. 5, 7, S6, Supplemental Table 8,  
326 [https://go.ncsu.edu/clockworkviridi\\_wnt](https://go.ncsu.edu/clockworkviridi_wnt)).

## 327 328 **DISCUSSION**

329 The asymmetric warming between day and night is an important environmental variable to consider for  
330 sustaining crop productivity in future climate scenarios. The physical phenomena of a significantly thinner  
331 planetary boundary layer during the night compared to the day, leads to larger effects on the surface air  
332 temperature during the nighttime<sup>66</sup>. WNT have a negative impact on large geographic regions, affecting  
333 agricultural productivity, compared to the more localized impact predicted for increasing daytime  
334 temperatures<sup>7</sup>. We observed the effects of WNT on field-grown rice plants. Prior studies have tested the  
335 effects of increased nighttime temperature in different genetic backgrounds, in chamber or greenhouse  
336 conditions, exposing plants to more extreme nighttime temperatures<sup>16-18,67</sup> that are greater than the  
337 nighttime temperatures predicted by IPCC or other climate models<sup>1,68</sup>. However, a modest 2°C increase in  
338 nighttime temperature also reduced yield from 0-45.3% depending on year and variety<sup>69</sup>. From our  
339 treatment of similar temperature regime, we observed a significant 12.5% decrease in yield.

### 340 341 *WNT Alter the Timing of Fundamental Biochemical Processes*

342 The term thermoperiodicity describes the differential impacts of day and night temperature changes  
343 on plants<sup>70,71</sup>. Thermoperiodicity and the negative impacts of WNT have been observed in many crops and  
344 ornamental species<sup>72-76</sup>. Mechanisms for why a mild increase in nighttime temperature has such substantial  
345 impacts in contrast to a similar increase in daytime temperatures are not fully understood. Photosynthesis,  
346 transpiration, and respiration are temperature sensitive processes that contribute to yield. However, only  
347 respiration occurs consistently during the day and night. An increase in nighttime respiration has been  
348 associated with high nighttime temperatures<sup>16,17,76-81</sup>. Therefore, increases in dark respiration are often  
349 considered as the primary mechanism for the observed decrease in yield. However, the increase in  
350 maintenance, or nighttime respiration, may not fully explain the difference in yield<sup>73,82</sup>. The impacts of high  
351 nighttime temperature during the vegetative stage can be compensated by active photosynthetic  
352 machinery<sup>81</sup>. In addition, the response of dark respiration under high nighttime temperature has only been  
353 documented in the leaf tissue either in rice<sup>20,81,83</sup> or in wheat<sup>84</sup>, with no reports on panicle tissue.

354           Increasing nighttime temperatures have been associated with both positive and negative effects on  
355 the next day's photosynthesis<sup>80,85–88</sup>. The protective role of light-driven electron flow is not available in the  
356 dark, resulting in increased reactive oxygen species production and damage to photosystem II<sup>89</sup>. Therefore,  
357 the photosystems of many species of plants are more sensitive to heat-induced damage in the dark than in  
358 the light. Our findings that the early morning transcriptional induction of many of the photosynthetic genes  
359 is delayed in response to WNT may indicate that the altered timing of photosynthesis may compound the  
360 effects of increased respiration rates. Additionally, if the gene expression changes are reflective of the  
361 physiological timing, the delayed induction and subsequent overexpression later in the day we observe  
362 would result in variation in the observed difference in photosynthetic activity between control and WNT  
363 plants. Thus, the time of day the activity is measured could explain the conflicting reports of the effects of  
364 WNT on photosynthesis.

365

#### 366 *The Phase-relationship as a Marker for WNT sensitivity*

367 Examination of the transcriptional effects at a single timepoint would have missed potentially important  
368 transcriptional changes. For example, many of the upregulated genes are detected during the morning time  
369 points, while many of the downregulated genes are only downregulated during the nighttime hours. By  
370 examining transcripts at multiple time points, we can observe changes in the timing of expression that  
371 would be missed by a single time point. For example, we observe that many transcripts associated with  
372 photosynthesis show a delay in expression in the day and found changes in expression that would have been  
373 missed if the plants were sampled at the only one timepoint or were sampled only during the day. While  
374 any single time point captures at most 36% of the total WNT sensitive DEGs. However, examining the  
375 DEGs at Dawn and one hour before Dawn captures 59% of the total DEGs, and 79% of the total DEGs is  
376 captured by three time points (Dawn, 7h, and 23h).

377

#### 378 *Disruption of Thermocycles may Contribute to the Negative Effects of WNT*

379 While WNT can increase the rate of the biochemical activities occurring at night, another aspect of WNT  
380 is that they reduce the daily temperature range (DIF). This day to night temperature amplitude or  
381 thermocycle is beneficial to overall crop productivity<sup>90</sup>. Many crops have reduced yield under constant light  
382 conditions<sup>91</sup>, yet the damage caused by constant light can be reduced by providing a thermocycle with warm  
383 days and cooler nights in tomato and potato<sup>92–94</sup>. In tomato, net photosynthetic rates drop when grown in  
384 constant light and can be recovered by providing a recurring, daily temperature drop for just 2h, suggesting  
385 that the change in temperature acts as a cue to establish diel rhythms<sup>95</sup>. A linear relationship was observed  
386 between reduction in the DIF and adverse effects on morphology (e.g., reduced biomass) and physiology  
387 (e.g., increased nighttime respiration) in maize<sup>76</sup>. A large DIF could reduce the harmful effects of daytime

388 heat on photosynthesis emphasizing the importance of the amplitude component of the daily temperature  
389 cycle. In Arabidopsis and rice, about 30-50% of the transcriptome is rhythmic under thermocycles in  
390 constant light, indicating that gene expression is one mechanism of responding to thermocycles<sup>44,96</sup>.

391 In field conditions, we observe rhythmic expression of most transcripts, consistent with prior  
392 observations<sup>97-99</sup>. Our results in the rice panicle show that WNT globally disrupts the timing of gene  
393 expression in field conditions. Even after weeks of growth in increased nighttime temperatures, the  
394 transcriptional profiles differed between WNT and NNT panicles. Therefore, we propose an additional  
395 mechanism for the detrimental impacts of WNT. By disrupting the global patterns of gene expression, WNT  
396 disrupts the synchrony of molecular activities within the plant and the coordination with the external  
397 environment. The disrupted phase relationship between the timing of gene expression, downstream  
398 molecular events, and environmental factors results in reduced productivity. Although not well studied in  
399 rice, in Arabidopsis, plants that have a clock that is out of sync with their environment show decreased rates  
400 of growth and photosynthesis<sup>39,100,101</sup>. In barley, rhythmic expression of photosynthetic parameters showed  
401 allelic variation that suggests adaptation to local environments<sup>102</sup>. Therefore, the observed disruption of  
402 rhythmic expression could contribute to the overall decrease in yield and biomass (Fig. 1).

403

#### 404 *Disruption of the Circadian Clock and Phytochrome Signaling by WNT*

405 In Arabidopsis and rice, thermocycles can entrain the circadian clock and control the rhythmic expression  
406 pattern of up to 30% of the transcriptome<sup>42-44</sup>. In field conditions, we were not able to evaluate if the WNT  
407 effects persisted in constant light and temperatures. However, when we compared the WNT sensitive  
408 transcripts with prior data that identified circadian -regulated genes in rice, many of the WNT DEGs were  
409 circadian-regulated<sup>44</sup>. WNT DEGs are enriched for circadian-regulated transcripts when entrained by  
410 thermocycles alone or both light and temperature cycles in combination, but not when entrained by  
411 photocycles alone (Fig. 3). The enrichment for WNT DEGs in transcripts identified as thermocycle  
412 entrained suggests that WNT are disrupting the cues needed for proper timing of the expression of these  
413 transcripts. The transcripts rhythmically expressed in response to thermocycles are largely distinct from  
414 those entrained by photocycles<sup>43,44</sup>. The functional significance of thermocycle-entrained genes has not  
415 been established in any plant species. However, if the negative impacts of WNT are due in part to the  
416 altered expression of thermocycle-entrained genes, understanding the roles of thermocycles in plant  
417 signaling and responses will be a critical component to anticipating the impacts of asymmetric changes in  
418 temperature patterns<sup>66</sup>.

419 How the DIF is perceived and integrated into the circadian clock is unknown. Our gene regulatory  
420 network analysis identified 26 TFs with targets disrupted by WNT. Many of these TFs are known circadian  
421 clock regulators, associated with the circadian clock, or are themselves expressed rhythmically. We

422 identified PIF1, a bHLH and Phytochrome Interacting Factor as a candidate regulator of WNT sensitive  
423 transcripts. In Arabidopsis, the OsPIF1 homologs, *AtPIF4* and *AtPIF5* are regulators of thermoresponsive  
424 growth<sup>103–105</sup> and interact with circadian clock components<sup>106,107</sup>. *AtPIF4* upregulates the auxin pathway,  
425 activating growth in response to increasing temperatures<sup>108,109</sup>. Under increasing temperatures, the  
426 expression of *AtPIF4* and *AtPIF5* is regulated by *AtPHYB*. *AtPHYB* interacts with *AtELF3*, a component  
427 of the clock's evening complex<sup>106,110,111</sup>. Loss of function mutations in the evening complex mimics the  
428 *phybde* loss of function knockouts under warmer temperatures<sup>112,113</sup>. These interactions indicate that the  
429 photoreceptor PHYB connects changes in ambient temperature to the circadian clock in Arabidopsis<sup>45–47</sup>.  
430 Although the connections between phytochromes and increasing temperature are not as well studied in rice,  
431 if WNT affect the rate of interconversion between active and inactive forms of PHYB in rice, this could  
432 disrupt the output from the circadian clock through PHYB. The observed disruption of rhythmic expression  
433 of thermocycle-entrained genes could be a consequence of the impact on this PHYB signaling pathway. In  
434 Arabidopsis, the higher-order phytochrome mutants show a disruption in the timing of metabolite  
435 accumulation. In the loss of function mutants of four of the five Arabidopsis phytochromes, the plants  
436 accumulate sugars and amino acids to a higher level during the day and mobilize the sugars faster at night.  
437 Thus the reduced biomass of the phytochrome mutants is due to altered timing of photosynthesis and  
438 growth<sup>114</sup>. WNT grown rice plants also show a significant reduction in biomass (Fig 1) and alterations in  
439 grain quality<sup>115–119</sup> suggesting changes in sugar mobilization.

440 Recent research suggests that the plant circadian clock is dynamically plastic to changes in the  
441 environment, which contributes to maintaining carbon homeostasis<sup>41</sup>. Feedback from the metabolic status,  
442 in part through endogenous sugar levels, can dynamically adjust the circadian oscillator depending on when  
443 the altered metabolism is perceived. These dynamic responses may explain contrasting shifts in expression  
444 we observe. For example, the delay in morning expressed photosynthetic transcripts and the advance in  
445 expression of genes with nighttime peaks in expression (Fig. 4E-H) may reflect temporally-varying WNT  
446 induced changes in carbon use and mobilization.

447 We also identified *PRR95* as a candidate regulator of WNT sensitive genes. *PRR95*, a member of  
448 the Pseudo Response Regulator (PRR) family, is a known circadian clock component in rice<sup>58,120</sup>. In  
449 Arabidopsis expression of PRR family members responds to temperature changes and *AtPRR7* and *AtPRR9*  
450 are important for temperature compensation, the ability of the clock to maintain a similar period across a  
451 range of temperatures<sup>121</sup>. Here we find that WNT alters the expression of *PRR95* (Fig. 7) and the predicted  
452 *PRR95* targets. In our nighttime temperature gradients, we observed a high correlation between PIF1 and  
453 *PRR95* expression and the expression of their predicted targets. This co-expression across a decreasing DIF  
454 supports the predicted regulatory role of PIF1 and *PRR95* on these WNT sensitive transcripts and the effects

455 of the thermocycle amplitude potentially through the circadian clock or phytochrome signaling on gene  
456 expression.

457 In addition to PRR95 and PIF1, we also identified other candidate regulators of WNT DEGs associated  
458 with the circadian clock. BBX24 is a CONSTANS like transcription factor which in Arabidopsis is an  
459 activator of PIF activity<sup>64</sup>. EDH4, a regulator of flowering and is essential in the environmental coordination  
460 of flowering<sup>122</sup>. Our findings suggest that WNT disrupt the temporal expression of transcripts by affecting  
461 the circadian clock or circadian-related components. However, we cannot distinguish if the effects on grain  
462 yield and biomass are due to direct effects of reduced amplitude on the entrainment of the circadian clock,  
463 through the downstream effects of increased nighttime respiration, or through temperature effects on  
464 transcription, translation, or other biological activities necessary for proper temporal coordination.  
465 However, by identifying the upstream regulators of the transcripts affected by WNT we can evaluate what  
466 processes may trigger the changes in gene expression.

467 In conclusion, growth under WNT results in global reprogramming of the rhythmic expression of  
468 the panicle transcriptome and multiple indicators suggest that this is through altered regulation of the  
469 circadian clock or the circadian-regulated outputs. It is unclear if the observed effects are a direct effect of  
470 WNT on the circadian clock machinery or an indirect consequence of increased nighttime respiration or  
471 altered metabolite transport. However, our results suggest that altered timing is a vital phenotype to monitor  
472 in response to WNT. The candidate regulators and their WNT-sensitive targets identified here can be used  
473 as markers to monitor the response to WNT across environments and genotypes and to identify the  
474 mechanisms to improve tolerance to WNT in anticipation of future weather patterns.

475

## 476 ACKNOWLEDGMENTS

477 This project was supported by the Agriculture and Food Research Initiative competitive grant #2015-67013-  
478 22814 of the USDA National Institute of Food and Agriculture and the USDA National Institute of Food  
479 and Agriculture project 1002035.

480

## 481 MATERIALS AND METHODS

### 482 **Crop Husbandry**

483 Rice (*O. sativa* cv. IR64) was grown at the IRRI, Philippines during the dry season of 2014 (14°  
484 11° N, 121° 15° E, 21 MASL). Seeds were exposed to 50 °C for three days to break dormancy. Pre-  
485 germinated seeds were sown in seeding trays and grown in the greenhouse for 14 days. Seedlings were then  
486 transplanted in the field at a spacing of 0.2 m x 0.2 m with one seedling per hill. Basal fertilizer composed  
487 of nitrogen (45 kg ha<sup>-1</sup> N as urea), phosphorus (30 kg ha<sup>-1</sup> P as single superphosphate), potassium (40 kg  
488 ha<sup>-1</sup> K as KCl), and zinc (5 kg ha<sup>-1</sup> Zn as zinc sulfate heptahydrate) was applied a day before transplanting.

489 Plots were top-dressed with additional nitrogen during mid-tillering (30 kg ha<sup>-1</sup> N), panicle initiation (45  
490 kg ha<sup>-1</sup> N), and heading (30 kg ha<sup>-1</sup> N). Plots were kept fully flooded until just before harvesting at  
491 physiological maturity. Appropriate insecticides were used to control pest and disease damage.

492 Validation experiments under a gradient of nighttime temperatures were grown during the dry  
493 season of 2015. IR64 plants were pre-germinated and transplanted as described above and grown in a field-  
494 based tent facility at the IRRI, Philippines. Standard crop management practices including fertilizer  
495 application and pest control were followed<sup>13</sup> and were similar to the 2014 experiment.

496

### 497 **Stress Treatment**

498 An infrared heating facility using ceramic heaters was used to impose high temperatures during  
499 nighttime (1800-0600h) starting at panicle initiation until physiological maturity. The system has been  
500 described in detail in Gaihre et al. 2014<sup>123</sup>. The heated plots, with six ceramic heaters each, were  
501 programmed to have a temperature of +3 °C relative to the ambient temperature recorded from the  
502 control/reference plots. A total of eight rings were used in the experiment, with four replications per  
503 treatment. Temperatures were recorded throughout the day at 5-min intervals and monitored on a daily basis  
504 to ensure that the target temperature was achieved.

505 The physiological effects of WNT were measured by comparing rice grown in WNT to NNT. An  
506 increase in nighttime temperature in the field was achieved by planting rice inside a ring of ceramic heaters  
507 and maintaining a 3°C (actual: 2.36°C, SD ± 0.23) increase in air temperature inside the ring from dusk till  
508 dawn relative to ambient conditions (Fig. S1). The treatment was started from panicle initiation and  
509 persisted through the flower development and grain filling until physiological maturity. Throughout the  
510 experimental period the plants inside the WNT ring received the same temperature as the control plants  
511 during the daytime periods, but were consistently 2-2.5°C warmer at night (Fig. S1). The average diel  
512 amplitude in temperature was 9.1°C for NNT plants and was 6.7°C for WNT grown plants. For the entire  
513 period of stress imposition, the plants experiencing WNT did not receive a sudden increase in temperature,  
514 but rather a reduced decline in temperature (See insert Fig. S1).

515 Validation experiments in the temperature gradients were performed in field-based tents with  
516 programmed temperature control (for details see <sup>13</sup>) were used to impose different nighttime temperatures.  
517 In brief, plants were exposed to ambient conditions during the day and exposed to target temperatures at  
518 night (18:00 – 06:00), starting from panicle initiation until physiological maturity. Temperature and relative  
519 humidity inside the tents were monitored using HOBO sensors installed above the canopy height<sup>13,14</sup>. Plants  
520 were exposed to a total of four different night temperature conditions. Set temperature ranged from 24 –  
521 30 °C with 2 °C increments. Heaters were used to impose 24, 26, 28, and 30 °C treatments. Two replicate  
522 tents were randomly allotted for each of the treatments.



523

## 524 **Sample Collection**

525 Whole panicles at the 50% flowering stage (i.e. upper 50% of the panicle has just finished  
526 flowering) were collected. Uniform sets of panicles were identified, tagged, and collected when the middle  
527 portion of the panicle had spikelets undergoing anthesis or flower opening (time point dawn + 3.5h) or had  
528 just flowered (all other time points). The tagged panicles were collected at dawn (6:15AM), dawn + 3.5h,  
529 dawn + 7h, dawn + 10.5h, dusk, dawn + 14h, dawn + 17.5h and just before the next dawn, i.e. dawn + 23h.  
530 For each treatment, four replicates per time point were collected. Samples were collected in tubes and  
531 immediately immersed in liquid nitrogen, after which were stored at -80 °C until sample processing.

532 For the nighttime temperature gradient samples, main tillers with panicles at 50% flowering were  
533 identified and tagged for sample collection. Panicles were collected immediately after sunrise and sunset.  
534 For each controlled nighttime temperature, two replicate panicles were collected per tent, yielding a total  
535 of four replicates per treatment. The 24°C nighttime temperature was closest to the average NNT conditions,  
536 while the average nighttime temperature of our WNT samples described above was closer to 26°C (Fig.  
537 S1). Samples were collected in 50 mL falcon tubes and immediately immersed in liquid nitrogen, and stored  
538 at -80°C until analysis.

539

## 540 **Agronomic Characterization**

541 Twelve hills from each replicate plot were harvested at physiological maturity to measure yield and yield  
542 components including total aboveground biomass, number of spikelets per panicle, 1000-grain weight,  
543 panicle per m<sup>2</sup>, and spikelet fertility (Supplemental Table 1). Samples were processed according to standard  
544 practices following Lawas et al.<sup>124</sup>. To evaluate the effects of WNT treatment on each trait we performed  
545 the Kruskal-Wallis Test using R version 3.4.1.

546

## 547 **Library Preparation**

548 The upper 50% of the panicle was first ground in liquid nitrogen with a metal pestle. The tissue was then  
549 lyophilized at -60°C overnight before RNA extraction. Total RNA was extracted using the RNeasy Plant  
550 Mini Kit (Qiagen) with the recommended RLT lysis buffer. The provided RNA extraction protocol was  
551 followed by the inclusion of DNase treatment. After the RWI wash step, 3 uL of DNaseI (10U/ul Roche),  
552 8 uL buffer (200 mM Tris, pH 8.0, 20 mM MgCl<sub>2</sub>, 500 mM KCl), and 69 uL nuclease-free water was added  
553 to each column and incubated at room temperature for ten minutes. Following DNase treatment, the column  
554 was rewashed with the RWI buffer from the Qiagen kit. The RNA concentration was then measured with  
555 NANODrop 2000 (Thermo Scientific). Two micrograms of RNA were used with NEBNext Poly(A)  
556 Magnetic mRNA isolation kit (NEB). Oligo(dT) attached to magnetic beads isolate mRNA by attaching to

557 ploy(A) modified mRNA. Before library preparation, mRNA was heated to 95°C for the recommended 15  
558 minutes to achieve 150-200bp fragment sizes. NEBNext Ultra RNA Library Prep Kit for Illumina was then  
559 used to prep mRNA for sequencing. cDNA was prepared with random hexamers and a Protoscript II reverse  
560 transcriptase for the first strand synthesis and followed by second strand synthesis. DNA was size selected  
561 using AMPure beads (Beckman Coulter) after end repair and adaptor ligation to isolate 150-200bp  
562 fragments. PCR library enrichments was then done with the inclusion of USER step for strand specificity.  
563 Fifteen cycles (the maximum recommended number of cycles) was used which did not result in any over  
564 amplification peaks. To measure library quantity and quality, samples were analyzed on an Agilent  
565 Bioanalyzer high sensitivity DNA chip after a 1:4 (or 1:10 if the concentration is too high) dilution and  
566 quantified using the NEB library qRT quantification kit. Libraries were diluted to 10nmol/ul concentrations  
567 before sequencing. Sequencing was done at North Carolina State University's Genomics Science  
568 Laboratory on the Illumina Hiseq 2000.

569

#### 570 **RNA-Seq Data Alignment and Quantification**

571 After FastQC, fastq files were trimmed by 10nts with seqtk Trim fastq. Option used: -b -10. Fastq files  
572 were trimmed by 10nts before being aligned. Trimmed files were aligned using tophat v2. Reads were  
573 mapped to the indica variety MH63 and mapped the reads to the MH63 reference genome<sup>59,125</sup>. The  
574 reference genome and annotation files were obtained from <http://rice.hzau.edu.cn/rice><sup>59</sup>. Mismatches  
575 allowed was 2, read gap length was 2, library type was set to first-strand, and the rest of the parameters  
576 remain as the default. The resulting bam files were then piped to htseq count version 0.6.0. Using the  
577 options -f bam, -s reverse, and -m intersection-nonempty counts per gene were generated for the annotated  
578 genes in MH63. Each sample had 80% or greater reads mapped. We observed low variability between  
579 replicates within both NNT and WNT groups (Fig. S2 and S3).

580

#### 581 **Differential Expression**

582 The raw count matrix was used for differential expression analysis with EdgeR version 3.10.5<sup>126</sup>. The genes  
583 were first filtered by counts; genes with more than 10 counts in four samples were kept. Normalization  
584 factors and dispersion estimates were then done according to the EdgeR pipeline. Differentially expressed  
585 genes (DEGs) between plants exposed to WNT or NNT at each time point were identified (Fig. 2) using  
586 EdgeR's generalized linear models and a likelihood ratio test determined differential expression of  
587 transcripts. A FDR < 0.05 & logFC > 0.5 was considered to be differentially expressed. R version 3.2.1.  
588 Filters were applied to remove transcripts with less than 10 counts in less than 4 samples. Using filtered  
589 and aligned reads, transcript levels were used to find differentially expressed genes at different times of

590 day. Differentially expressed (DE) genes were identified using EdgeR, comparing each time point between  
591 HNT treated and control samples (FDR < 0.05 & logFC > 0.5).

592

### 593 **MapMan Enrichment**

594 All gene ontology tests were done with MSU annotations obtained from  
595 <http://www.gomapman.org/ontology><sup>49</sup>. Enrichment was then calculated using all MH63 genes as the  
596 background and either DE genes or genes that lost rhythmicity in HNT as the input. Phyper was used to  
597 calculate the p-value. After *p*-value adjustment for multiple testing corrections, a term with <0.05 FDR and  
598 a minimum of five genes per functional term were considered to be enriched.

599

### 600 **Enrichment of DEG in Diurnal and Circadian datasets**

601 PHASER<sup>127</sup> was used to look for enrichment of rhythmically expressed genes in 50% flowering time course  
602<sup>127</sup>. We limited our comparison to the 596 WNT DEGs that had orthologs to Nipponbare and were on the  
603 A-AFFY-126 (Affymetrix, Santa Clara, CA) used by Filichkin et al.,<sup>44</sup>. After conversion of MH63 IDs to  
604 Nipponbare MSU orthologs, all DEG genes were used as an input to Phaser. The LDHC and LLHH\_LLHC  
605 conditions of *Oryza sativa* data were used as the background. A correlation cutoff of 0.7 was used.

606

### 607 **JTK Cycle**

608 JTK cycle R script was taken from [http://www.openwetware.org/wiki/HughesLab:JTK\\_Cycle](http://www.openwetware.org/wiki/HughesLab:JTK_Cycle)<sup>50</sup>. To  
609 stringently identify differentially cycling genes, circadian core genes<sup>98</sup>, were plotted in the NNT data. The  
610 transcripts were visually inspected, ranked by JTK *q*-value, and a cutoff of the JTK *q*-value was set for the  
611 last gene that was clearly rhythmically expressed (MH03t0197300, 6.617080673040279e-15 inclusive).  
612 This *q*-value cutoff resulted in 6248 periodic in NNT, 4112 periodic in NNT and WNT 2136 periodic in  
613 NNT but not WNT. Full statistical results are in Supplemental Table 10.

614

### 615 **Inference of Regulators in External Data Network**

616 Transcription regulators for rice were identified by RiceSRTFDB<sup>128</sup>. From Nagano et al. we exported 555  
617 samples and created 15 different time series sets<sup>52</sup>. The data include samples taken in intervals of every ten  
618 minutes, every two hours, and every 12 hours from different developmental stages and tissue types  
619 (Supplemental Table 6). The dataset was subset to RAP-IDs that had orthologs to MH63 IDs<sup>59</sup>. The  
620 microarray data were ordered by sample type to create a time sequential series for each sample type. Sample  
621 divisions are given in supplemental table 3, and ExRANGES was applied to a series that contained time  
622 information. ExRANGES weights gene expression by the significance of the change in expression and was  
623 used because it performs optimally on large time course datasets. ExRANGES parameters cycle was set to

624 FALSE and the sample size was set to 1000. The weight expression output of ExRANGES was then used  
625 to construct a transcription factor regulatory network. To predict regulatory interaction between the  
626 transcription factor and the target gene, GENIE3 source code was downloaded from  
627 <http://www.montefiore.ulg.ac.be/~huynh-thu/software.html><sup>54</sup>. For GENIE3, we used 1000 trees. The  
628 importance measure was then ranked for each TF and its targets. To validate network results, we used the  
629 top 200 predicted targets for PIF1 and LHY-Chr8. We compared ChIP-Seq targets for AtPIF4 and AtCCA1.  
630 Orthologs between RAP-IDs and Arabidopsis were converted using mappings downloaded from [rigw.org](http://rigw.org)<sup>59</sup>.  
631 To test for motif enrichments, Homer's findMotif.pl (v4.10) function was used on an imported version of  
632 the MH63 genome<sup>60</sup>. The motif search was limited to 500bp upstream of the transcription start sites and  
633 50bp downstream of TSS. The motif length was limited to 6, 8, and 10bps. To test for enrichment of DEGs,  
634 MH63 Ids were converted to RAP Nipponbare orthologs using [rigw.org](http://rigw.org)<sup>59</sup>. Using phyper, enrichment was  
635 calculated for the overrepresentation of WNT DEGs in TF targets. We tested enrichment for WNT DEGs  
636 for all TFs. We looked at enrichment in the top 10-200 predicted targets for each TF.

637

### 638 **Inference of Regulators in Internal Data Network**

639 For comparison of gene regulatory networks from control and WNT panicle tissue, the edge finding pipeline  
640 from McGoff et al.<sup>65</sup> was employed. The predicted regulators of each TF were determined by constructing  
641 a regulatory network consisting of TFs with homology to known circadian regulatory TFs and determining  
642 their potential for regulating the TFs with altered expression in WNT. The model considered the  
643 relationship between each potential regulator and the altered TFs of interest using the gene expression  
644 dynamics observed by RNA-Seq<sup>65</sup>. A model distribution was constructed to determine the topological  
645 differences between model gene regulatory networks in NNT and WNT. First, dynamic gene profiles were  
646 selected for analysis. Rice Transcription Factors were first analyzed by DEseq to determine if they were  
647 differentially expressed in Control and WNT samples (FDR < 0.05). Next, using the JTK periodicity finding  
648 algorithm, highly periodic TFs from control and WNT samples were identified, considering the possibility  
649 that a TF may be highly periodic in one dataset and not another. Also, TFs that demonstrated periodic  
650 dynamics in both control and WNT were added, even if their peak times were not consistent between  
651 experiments. Finally, known circadian regulators were added. All told, 368 genes were considered, of which  
652 356 were Transcription Factors. Using the edge finding pipeline, only TFs were considered for regulators,  
653 while all 368 genes were target nodes.

654 From the edge finding algorithm, the following attributes of each possible regulator node to target  
655 node interaction were collected. Replicate 2 from control tissue and Replicate 2 from WNT were used for  
656 network analysis. Edge Probability (EP) – the likelihood that an edge exists between a given regulator and  
657 a given target. This measure considers the goodness-of-fit of the regulation simulation to the observed data

658 and a number of other factors. The score ranges from 0 to 1 and the sum of all scores for a single target is  
659 1. The higher likelihoods have larger values. Mean Squared Error (MSE) – the mean squared error for the  
660 regulation simulation compared to the observed data. This is always a positive number. Smaller values  
661 indicate a better fit. Baseline Error (BE) – compares the error for the simulation versus the error for a  
662 straight line fit. The output ranges from 0 to 1. Smaller values indicate a better fit. This provides a  
663 normalized goodness of fit measure. Target Rank Edge Probability (TREP) – shows how a given edge ranks  
664 against other edges leading to the same target. The smaller values indicate better rankings.

665 An inspection of the results led to construction of Control Panicle gene regulatory networks that  
666 satisfied the following criteria: The TREP must be in the top 3 potential regulatory edges for each target  
667 node. The BE must also be less than 0.25. Finally, each TF node must have at least one edge “in” and one  
668 edge “out” indicating that it is both a target and regulator of another TF in the network. These score cut-  
669 offs result in a gene regulatory network model that allows for comparison to the WNT Panicle GRN. To  
670 determine differences in network topology, regulator targets in WNT were identified when their regulator  
671 profile were altered (different regulators in the top 3 TREP and altered incoming edge scores). For each  
672 target, non-parametric correlation between regulator scores from control and HNT (Baseline Error) were  
673 computed. If there was no significant correlation ( $p > 0.05$ ), this target is perturbed. 193 genes in the  
674 network had significant positively-correlated regulation between NNT and WNT. 89 genes in the GRN  
675 constructed in NNT were perturbed in the WNT panicle. Network visualizations using these criteria were  
676 constructed in Cytoscape<sup>129</sup>.

677

#### 678 **Figure Legends:**

679 **Figure 1. WNT impacts on agronomic performance** The effects of the Warm Nighttime Temperatures  
680 treatment (WNT, Red) compared to Normal Nighttime Temperatures (NNT, Blue) on agronomic traits of  
681 grain yield ( $\text{g/m}^2$ ), average 1000-grain weight (g), spikelets per panicle, and biomass ( $\text{g/m}^2$ ). Twelve plants  
682 were sampled from each of four plots per treatment. Error bars indicate  $\pm\text{SE}$  ( $n=4$ ).

683

684 **Figure 2. Differentially expressed genes in response to WNT** Differentially expressed genes identified  
685 by comparing expression levels between Warm Nighttime Temperatures (WNT) and Normal Nighttime  
686 Temperatures (NNT) at each time point ( $\text{FDR} < 0.05$  and  $\log\text{FC} > 0.5$ ). Time points indicate sample time  
687 in hours after dawn. Number of transcripts (A) upregulated and (B) downregulated in WNT compared to  
688 NNT at each time point. An eigengene representation of all (C) upregulated and (D) downregulated DEGs  
689 in WNT (red) and NNT (blue). White/black bar indicates day/night period respectively. The red bar  
690 indicates the time period when WNT plants were exposed to higher temperatures. Error bars indicate  $\pm\text{SE}$   
691 ( $n=4$ ).

692

693 **Figure 3. Rhythmic and circadian-regulated transcripts have increased sensitivity to WNT**

694 Comparison of Warm Nighttime Temperatures (WNT) DEGs to a prior experiment examining diel  
695 rhythmic and circadian regulated expression of rice transcripts<sup>44</sup>. (A) The enrichment of WNT DEGS  
696 compared to the phase of peak expression for rice transcripts when grown in photocycles and thermocycles.  
697 Enrichment is colored by  $p$ -value < 0.001 (red), <0.01 (orange), <0.05 (green), and underrepresented  
698 (purple). (B) Expression pattern of example transcript, *LOC\_Os10g41550* (MH10g0431700) in conditions  
699 with both photocycles and thermocycles (black), Normal Nighttime Temperatures (NNT, blue), WNT (red).  
700 Enrichment of WNT DEGs in sets of transcripts identified as rhythmic or non-rhythmic from plants grown  
701 in (C) photocycles only, (D) thermocycles only, and (E) after entrainment in photo- and thermocycles.  
702 Enrichment of WNT DEGs in sets of transcripts identified as circadian-regulated after entrainment in (F)  
703 both photocycles and thermocycles, (G) thermocycles only, and (H) photocycles only. Significantly  
704 overrepresented (red) significantly underrepresented (purple).

705

706 **Figure 4. Patterns of expression are disrupted by WNT** (A) Heatmap of gene expression of rhythmic

707 genes identified by JTK cycle in Normal Nighttime Temperatures (NNT) and Warm Nighttime  
708 Temperatures (WNT). Genes are ordered by NNT dynamics. The difference in peak time is the difference  
709 between the time of max expression in NNT compared to WNT. (B) Heatmap of gene expression of genes  
710 that are rhythmic in only NNT. The difference in peak time is the difference between the time of max  
711 expression in NNT compared to WNT. (C)  $-\log_{10}$ ( $Q$ -value) distribution of NNT (blue) and WNT (red)  
712 JTK analysis of gene that cycle uniquely in NNT. (D) WNT alters the ratio of morning to evening peak  
713 phases of gene expression. (E) Circos plot of genes that are rhythmic in both NNT and WNT that show a  
714 change in the timing of their peak expression. Phase of peak expression in NNT is anchored on the left half  
715 of the plot, and phase of peak expression in HNT is on the right. Only transcripts which shown a change in  
716 peak expression are plotted. (F) Expression pattern of MH03g0450600 a transcript representative of genes  
717 with a peak of expression at 3.5h in NNT (Blue) that shifts to 7h in WNT (Red). Enrichment for MapMan  
718 ontology of genes with this 3.5h to 7h shift in peak expression are shown. G) Expression pattern of  
719 MH07g0175300 a representative transcript of the group of genes with a peak in expression at 17.5h in NNT  
720 (Blue) that advances to 14h in WNT (Red). Functional enrichment from MapMan Ontology is shown for  
721 genes with this shift (light blue). (H) Expression pattern of MH12g0102300, selected to represent the group  
722 of transcripts that peak at 23h in NNT and the peak expression is delayed until dawn in WNT. Function  
723 enrichment from MapMan ontology is shown for genes with this shift (red). (I) Density plot showing  
724 changes in timing of peak expression between NNT and WNT for genes identified as WNT DEGs.

725

726 **Figure 5. Inferring regulatory networks to identify WNT perturbed targets** (A) Workflow to  
727 establish Targets of Transcription Factors (TF)s. (B) Enrichment of TF targets for Warm Nighttime  
728 Temperature (WNT) DEGs from panicle time course. The enrichments score for the overlap of TF  
729 targets and DEGs is plotted on the y-axis as  $-\log_{10}(\text{p.value})$ . The enrichment test was performed  
730 for top 10-200 predicted TF targets. All annotated TFs were tested, each TF is represented by a  
731 grey line. Lines above dotted lines represent significance lower than a p.value of 0.01. Lines above  
732 dotted lines represent significance lower than a p.value of 0.05. TFs are colored by their peak  
733 expression (CPM) in the NNT time course. Red to green corresponds to high to low expression.  
734 (C) Table of significant regulators of WNT DEGs identified from external data source. TFs are  
735 sorted by their peak expression (CPM). \* indicates significant regulators also identified by internal  
736 data source. (D) Overlap of the TF regulators and DEG targets. TF (grey), unknown/other targets  
737 (white), photosynthesis target (green), carbohydrate metabolism (blue) are connected by group 1  
738 edges (yellow), group 2 edges (light blue), and group1/2 edges (light green). (E) Expression (CPM)  
739 of PIF1 at dawn (white) and dusk (grey) under night time temperatures of 24°C, 26°C, 28°C, and  
740 30°C. All PIF1 targets and PIF1 targets that are also DEGs are separated into activated and  
741 repressed targets at dawn (white) and dusk (grey) timepoints. Line represents mean normalized  
742 expression (gene expression divided mean gene expression) of all targets at 24°C (green), 26°C  
743 (dark yellow), 28°C (orange), and 30°C (red). The shaded region represents standard deviation. (F)  
744 Expression (CPM) of PRR95 at dawn (white) and dusk (grey) under night time temperatures of  
745 24°C, 26°C, 28°C, and 30°C. All PRR95 targets and PRR95 targets that are also DEGs are  
746 separated into activated and repressed targets at dawn (white) and dusk (grey) timepoints. Line  
747 represents mean normalized expression of all targets at 24°C (green), 26°C (darkyellow), 28°C  
748 (orange), and 30°C (red). The shaded region represents standard deviation between target gene  
749 expression.

750

751 **Figure 6. Distinct NNT and WNT networks from Internal Data** A network of  
752 Circadian/Circadian related TFs with TREP  $\leq 3$  and BE is  $\leq 0.25$  using A) NNT or B) WNT  
753 Internal Data. Nodes colored by peak expression (0h - Green, 3.5h - Yellow, 7h - Orange, 10.5h  
754 - Dark Pink, 12h - Pink, 14h - Purple, 17.5h - Dark Blue, 23h - Blue).

755

756 **Figure 7. Evaluation of Regulators of Warm Nighttime Temperature Responses in an**  
757 **Independent Experiment.** (A) Plot of enrichment of TF targets that are WNT sensitive using  
758 targets identified by the External (y-axis) and Internal network (x-axis). Enrichment Score is the -  
759  $\log_2(\text{p-value})$  of the hypergeometric test of the overlap between WNT DEGs and the predicted TF  
760 targets. Dotted lines are  $-\log_2(0.05)$  (B) Expression (CPM) of PIF1 at dawn (white) and dusk (grey)  
761 under night time temperatures of 24°C, 26°C, 28°C, and 30°C. All PIF1 targets and PIF1 targets  
762 that are also DEGs (purple) are separated into activated and repressed targets at dawn (white) and  
763 dusk (grey) timepoints. Line represents mean normalized expression (gene expression divided  
764 mean gene expression) of all targets at 24°C (green), 26°C (dark yellow), 28°C (orange), and 30°C  
765 (red). The shaded region represents standard deviation. (C) Expression (CPM) of PRR95 at dawn  
766 (white) and dusk (grey) under night time temperatures of 24°C, 26°C, 28°C, and 30°C. All PRR95  
767 targets and PRR95 targets that are also DEGs (purple) are separated into activated and repressed  
768 targets at dawn (white) and dusk (grey) timepoints. Line represents mean normalized expression  
769 of all targets at 24°C (green), 26°C (darkyellow), 28°C (orange), and 30°C (red). The shaded region  
770 represents standard deviation between target gene expression. (D) Expression (CPM) of SQL at  
771 dawn (white) and dusk (grey) under night time temperatures of 24°C, 26°C, 28°C, and 30°C. All  
772 SQL targets and SQL targets that are also DEGs (purple) are separated into activated and repressed  
773 targets at dawn (white) and dusk (grey) timepoints. Line represents mean normalized expression  
774 of all targets at 24°C (green), 26°C (darkyellow), 28°C (orange), and 30°C (red). The shaded region  
775 represents standard deviation between target gene expression.

776

### 777 **Supplemental Figure Legends**

778

779 **Supplemental Figure 1** Experimental setup of WNT field samples. (A) Image showing the growth of the  
780 WNT samples, contained within the ring of ceramic heaters that maintained (B) Actual temperature data  
781 from the period of panicle initiation, when the heaters were turned on for WNT plants until harvest. (C)  
782 Close up of four days of treatment showing that the day to night temperature difference in both NNT and  
783 WNT exceeds the nighttime temperature difference between NNT and WNT.

784

785 **Supplemental Figure 2** Violin plot showing variation between the replicates of samples from Normal  
786 Nighttime Temperatures (NNT). Pairwise comparisons of variation between each of the four NNT  
787 replicates. The distribution of the Kendall-Tau dissimilarity score (Score) for all transcripts is shown.



788

789 **Supplemental Figure 3** Violin plot showing variation between the replicates of samples from Warm  
790 Nighttime Temperatures (WNT). Pairwise comparison of variation between each of the four WNT  
791 replicates. The distribution of the Kendall-Tau dissimilarity score (Score) for all transcripts is shown.

792

793 **Supplemental Figure 4** Functional categorization and summarized expression of WNT DEGs. Mapman-  
794 based functional enrichment of genes (A) upregulated and (B) downregulated in response to Warm  
795 Nighttime Temperatures (WNT) compared to Normal Nighttime Temperatures (NNT).

796

797 **Supplemental Figure 5** The period expression of most genes is similar between Warm Nighttime  
798 Temperatures (WNT) and Normal Nighttime Temperatures (NNT). Density of genes with difference in  
799 period lengths indicated between WNT and NNT.

800

801 **Supplemental Figure 6.** Validating targets of other TFs responding to increasing nighttime temperature.  
802 Expression (CPM) of (A) Dof2, (B) BBX24, (C) bZIP71, (D) EDH4, (E) bZIP1, (F)? (G) Zf-CCCH54, (H)  
803 ZEP1, at dawn (white) and dusk (grey) under nighttime temperatures of 24°C (green), 26°C (dark yellow),  
804 28°C (orange), and 30°C (red). Mean of (A) Dof2, (B) EDH4, (C) Zf-CCCH54, BBX24, bZIP1, ZEP1,  
805 bZIP71 targets (black) and Dof2, EDH4, Zf-CCCH54, BBX24, bZIP1, ZEP1, bZIP71 targets that are also  
806 DEGs (purple) are separated into activated and repressed targets at dawn (white) and dusk (grey)  
807 timepoints. The line represents mean normalized expression (gene expression divided mean gene  
808 expression) of all targets at 24°C, 26°C, 28°C, and 30°C. The shaded region represents the standard  
809 deviation.

810

811 **Supplemental Table 1** Agricultural Traits for IR64 plants grown in Warm Nighttime Temperatures  
812 (WNT) and Normal Nighttime Temperatures (NNT).

813

814 **Supplemental Table 2** Genes identified as DEG in Warm Nighttime Temperatures (WNT) compared to  
815 Normal Nighttime Temperatures (NNT) at each time point. Log fold change (LFC) and FDR corrected  
816 significance (FDR) are shown. Positive LFC indicates the transcript is upregulated in WNT.

817

818 **Supplemental Table 3** Functional enrichment of genes identified as DEG in Warm Nighttime  
819 Temperatures (WNT) compared to Normal Nighttime Temperatures (NNT) at each time point using  
820 MapMan<sup>49</sup> terms.

821

822 **Supplemental Table 4** Genes identified as cycling in Normal Nighttime Temperatures (NNT), in Warm  
823 Nighttime Temperatures (WNT), cycling only in NNT, and cycling only in WNT.

824

825 **Supplemental Table 5** Functional enrichment of genes identified as rhythmic either only in Normal  
826 Nighttime Temperatures (NNT) or only in Warm Nighttime Temperatures (WNT).

827

828 **Supplemental Table 6** Samples used to generate External Data Network. The 555 samples from <sup>52</sup> that  
829 were used to construct the External Data Network. These were grouped into 15 series and the table indicates  
830 if ExRANGES was applied to each series.

831

832 **Supplemental Table 7** The gene identifiers of the transcription factors considered as regulators in  
833 ExRANGES for generation of External Data Network.

834

835 **Supplemental Table 8** Enrichment of the predicted targets of each regulatory transcription factor (TF)  
836 for differentially expressed genes (DEGs) under warm nighttime temperatures (WNT). Each TF tested for  
837 the External Data Network (1174 TFs) and the Internal Data Network (356 TFs). The enrichment score is  
838 the  $-\log_{10}(p\text{-value})$  of the predicted targets of that regulator for WNT DEGs. The six TFs enriched in  
839 both networks are indicated.

840

841 **Supplemental Table 9** Correlation between top candidate regulatory transcription factors (TFs) and their  
842 predicted targets in the validation assay using a gradient of warmer nighttime temperatures (WNT). The  
843 correlation between the top candidate TFs and all the predicted targets (All Targets) or the targets that  
844 were identified as WNT DEGs (WNT DEG Targets) in the WNT gradient experiment.

845 ..

846

- 847 1. Vose, R. S., Easterling, D. R. & Gleason, B. Maximum and minimum temperature trends  
848 for the globe: An update through 2004. *Geophys. Res. Lett.* **32**, L23822 (2005).
- 849 2. Zhao, C. *et al.* Temperature increase reduces global yields of major crops in four  
850 independent estimates. *Proc. Natl. Acad. Sci.* **114**, 9326–9331 (2017).
- 851 3. Masson-Delmotte, V. *et al.* IPCC, 2018: Summary for Policymakers. *Glob. Warm.* **1**,  
852 (2018).
- 853 4. Welch, J. R. *et al.* Rice yields in tropical/subtropical {Asia} exhibit large but opposing  
854 sensitivities to minimum and maximum temperatures. *Proc. Natl. Acad. Sci.* **107**, 14562–  
855 14567 (2010).
- 856 5. Peng, S. *et al.* Rice yields decline with higher night temperature from global warming.  
857 *Proc. Natl. Acad. Sci. U. S. A.* **101**, 9971–9975 (2004).
- 858 6. Nagarajan, S. *et al.* Local climate affects growth, yield and grain quality of aromatic and  
859 non-aromatic rice in northwestern India. *Agric. Ecosyst. Environ.* **138**, 274–281 (2010).
- 860 7. Jagadish, S. V. K., Murty, M. V. R. & Quick, W. P. Rice responses to rising temperatures  
861 - challenges, perspectives and future directions. *Plant, Cell Environ.* **38**, 1686–1698  
862 (2015).
- 863 8. Julia, C. & Dingkuhn, M. Predicting temperature induced sterility of rice spikelets  
864 requires simulation of crop-generated microclimate. *Eur. J. Agron.* **49**, 50–60 (2013).
- 865 9. Hirabayashi, H. *et al.* QEMF3, a novel QTL for the early-morning flowering trait from  
866 wild rice, *Oryza officinalis*, to mitigate heat stress damage at flowering in rice, *O. sativa*.  
867 *J. Exp. Bot.* **66**, 1227–1236 (2015).
- 868 10. Jagadish, S. V. K. *et al.* Genetic Analysis of Heat Tolerance at Anthesis in Rice. *Crop Sci.*  
869 **50**, 1633–1641 (2010).
- 870 11. Coast, O., Ellis, R. H., Murdoch, A. J., Quiñones, C. & Jagadish, K. S. V. V. High night  
871 temperature induces contrasting responses for spikelet fertility, spikelet tissue  
872 temperature, flowering characteristics and grain quality in rice. *Funct. Plant Biol.* **42**,  
873 149–161 (2015).
- 874 12. Mohammed, A. R. & Tarpley, L. High night temperature and plant growth regulator  
875 effects on spikelet sterility, grain characteristics and yield of rice (*Oryza sativa* L.) plants.  
876 *Can. J. Plant Sci.* **91**, 283–291 (2011).
- 877 13. Shi, W. *et al.* Source–sink dynamics and proteomic reprogramming under elevated night

- 878 temperature and their impact on rice yield and grain quality. *New Phytol.* **197**, 825–837  
879 (2013).
- 880 14. Bahuguna, R. N., Solis, C. A., Shi, W. & Jagadish, K. S. V. Post-flowering night  
881 respiration and altered sink activity account for high night temperature-induced grain yield  
882 and quality loss in rice (*Oryza sativa* L.). *Physiol. Plant.* **159**, 59–73 (2017).
- 883 15. Lyman, N. B., Jagadish, K. S. V., Nalley, L. L., Dixon, B. L. & Siebenmorgen, T.  
884 Neglecting Rice Milling Yield and Quality Underestimates Economic Losses from High-  
885 Temperature Stress. *PLoS One* **8**, e72157 (2013).
- 886 16. Cheng, W., Sakai, H., Yagi, K. & Hasegawa, T. Interactions of elevated CO<sub>2</sub> and night  
887 temperature on rice growth and yield. *Agric. For. Meteorol.* **149**, 51–58 (2009).
- 888 17. Mohammed, A. R. & Tarpley, L. Effects of high night temperature and spikelet position  
889 on yield-related parameters of rice (*Oryza sativa* L.) plants. *Eur. J. Agron.* **33**, 117–123  
890 (2010).
- 891 18. Mohammed, A. R. & Tarpley, L. Effects of High Night Temperature on Crop Physiology  
892 and Productivity: Plant Growth Regulators Provide a Management Option. in *Global*  
893 *Warming Impacts Stefano Casalegno* (ed. Casalegno, S.) (2011). doi:10.5772/24537
- 894 19. Zhang, Y. *et al.* Effects of high night temperature on yield and agronomic traits of  
895 irrigated rice under field chamber system condition. *Aust. J. Crop Sci.* **7**, 7–13 (2013).
- 896 20. Bahuguna, R. N. & Jagadish, K. S. V. Temperature regulation of plant phenological  
897 development. *Environ. Exp. Bot.* **111**, 83–90 (2015).
- 898 21. Chaturvedi, A. K. *et al.* Elevated CO<sub>2</sub> and heat stress interactions affect grain yield,  
899 quality and mineral nutrient composition in rice under field conditions. *F. Crop. Res.* **206**,  
900 149–157 (2017).
- 901 22. Matsuzaki, J., Kawahara, Y. & Izawa, T. Punctual Transcriptional Regulation by the Rice  
902 Circadian Clock under Fluctuating Field Conditions. *Plant Cell* tpc.114.135582 (2015).
- 903 23. Lu, Y., Gehan, J. P. & Sharkey, T. D. Daylength and Circadian Effects on Starch  
904 Degradation and Maltose Metabolism. *Plant Physiol.* **138**, 2280–2291 (2005).
- 905 24. Fowler, S. G., Cook, D. & Thomashow, M. F. Low Temperature Induction of Arabidopsis  
906 CBF1, 2, and 3 Is Gated by the Circadian Clock. *PLANT Physiol.* **137**, 961–968 (2005).
- 907 25. Greenham, K. & Robertson McClung, C. Temperature and the circadian clock. in  
908 *Temperature and Plant Development* 131–161 (John Wiley & Sons, Inc, 2014).

- 909 doi:10.1002/9781118308240.ch6
- 910 26. Horak, E. & Farré, E. M. The regulation of UV-B responses by the circadian clock. *Plant*  
911 *Signal. Behav.* **10**, 1–4 (2015).
- 912 27. Ingle, R. A. *et al.* Jasmonate signalling drives time-of-day differences in susceptibility of  
913 *Arabidopsis* to the fungal pathogen *Botrytis cinerea*. *Plant J.* **84**, 937–948 (2015).
- 914 28. Seo, P. J. & Mas, P. STRESSing the role of the plant circadian clock. *Trends Plant Sci.*  
915 (2015).
- 916 29. Gehan, M. A., Greenham, K., Mockler, T. C. & McClung, C. R. Transcriptional networks  
917 — crops, clocks, and abiotic stress. *Curr. Opin. Plant Biol.* **24**, 39–46 (2015).
- 918 30. Grenevich, D. *et al.* Novel transcriptional responses to heat revealed by turning up the  
919 heat at night. *Plant Mol. Biol.* **1**, Under review (2019).
- 920 31. Graf, A., Schlereth, A., Stitt, M. & Smith, A. M. Circadian control of carbohydrate  
921 availability for growth in *Arabidopsis* plants at night. *Proc. Natl. Acad. Sci.* 200914299  
922 (2010).
- 923 32. Graf, A. & Smith, A. M. Starch and the clock: the dark side of plant productivity. *Trends*  
924 *Plant Sci.* **16**, 169–175 (2011).
- 925 33. Dong, M. A., Farré, E. M. & Thomashow, M. F. CIRCADIAN CLOCK-ASSOCIATED 1  
926 and LATE ELONGATED HYPOCOTYL regulate expression of the C-REPEAT  
927 BINDING FACTOR (CBF) pathway in *Arabidopsis*. *Proc. Natl. Acad. Sci.* **108**, 7241–  
928 7246 (2011).
- 929 34. Sanchez, A., Shin, J. & Davis, S. J. Abiotic stress and the plant circadian clock. *Plant*  
930 *Signal. Behav.* **6**, 223–231 (2011).
- 931 35. Lai, A. G. *et al.* CIRCADIAN CLOCK-ASSOCIATED 1 regulates ROS homeostasis and  
932 oxidative stress responses. *Proc. Natl. Acad. Sci.* **109**, 17129–17134 (2012).
- 933 36. Bass, J. Circadian topology of metabolism. *Nature* **491**, 348–356 (2012).
- 934 37. Karayekov, E., Sellaro, R., Legris, M., Yanovsky, M. J. & Casal, J. J. Heat shock-induced  
935 fluctuations in clock and light signaling enhance phytochrome B-mediated *Arabidopsis*  
936 deetiolation. *Plant Cell* **25**, 2892–906 (2013).
- 937 38. Takeuchi, T., Newton, L., Burkhardt, A., Mason, S. & Farré, E. M. Light and the circadian  
938 clock mediate time-specific changes in sensitivity to UV-B stress under light/dark cycles.  
939 *J. Exp. Bot.* **65**, 6003–6012 (2014).

- 940 39. Dodd, A. N. Plant Circadian Clocks Increase Photosynthesis, Growth, Survival, and  
941 Competitive Advantage. *Science* (80-. ). **309**, 630–633 (2005).
- 942 40. McClung, C. R. Plant Circadian Rhythms. *Plant Cell Online* **18**, 792–803 (2006).
- 943 41. Webb, A. A. R., Seki, M., Satake, A. & Caldana, C. Continuous dynamic adjustment of  
944 the plant circadian oscillator. *Nat. Commun.* **10**, 4–9 (2019).
- 945 42. Michael, T. P., Salomé, P. A. & McClung, C. R. Two {Arabidopsis} circadian oscillators  
946 can be distinguished by differential temperature sensitivity. *Proc Natl Acad Sci USA* **100**,  
947 6878–6883 (2003).
- 948 43. Michael, T. P. *et al.* Network Discovery Pipeline Elucidates Conserved Time-of-Day-  
949 Specific cis-Regulatory Modules. *PLoS Genet.* **4**, (2008).
- 950 44. Filichkin, S. A. *et al.* Global Profiling of Rice and Poplar Transcriptomes Highlights Key  
951 Conserved Circadian-Controlled Pathways and cis-Regulatory Modules. *PLoS One* **6**,  
952 e16907 (2011).
- 953 45. Jung, J. *et al.* Phytochromes function as thermosensors in Arabidopsis. **354**, (2016).
- 954 46. Legris, M. *et al.* Phytochrome B integrates light and temperature signals in Arabidopsis.  
955 **354**, (2016).
- 956 47. Qiu, Y., Li, M., Kim, R. J., Moore, C. M. & Chen, M. Daytime temperature is sensed by  
957 phytochrome. *Nat. Commun.* (2019). doi:10.1038/s41467-018-08059-z
- 958 48. Mizuno, T. *et al.* Ambient Temperature Signal Feeds into the Circadian Clock  
959 Transcriptional Circuitry Through the EC Night-Time Repressor in Arabidopsis thaliana.  
960 **55**, 958–976 (2014).
- 961 49. Thimm, O. *et al.* MAPMAN: a user-driven tool to display genomics data sets onto  
962 diagrams of metabolic pathways and other biological processes. *Plant J* **37**, (2004).
- 963 50. Hughes, M. E., Hogenesch, J. B. & Kornacker, K. JTK\_CYCLE: An Efficient  
964 Nonparametric Algorithm for Detecting Rhythmic Components in Genome-Scale Data  
965 Sets. *J. Biol. Rhythms* **25**, 372–380 (2010).
- 966 51. Harmer, S. L. The circadian system in higher plants. *Annu. Rev. Plant Biol.* **60**, 357–377  
967 (2009).
- 968 52. Nagano, A. J. *et al.* Theory Deciphering and Prediction of Transcriptome Dynamics under  
969 Fluctuating Field Conditions. *Cell* **151**, 1358–1369 (2012).
- 970 53. Desai, J. S., Sartor, R. C., Lawas, L. M., Jagadish, S. V. K. & Doherty, C. J. Improving

- 971 Gene Regulatory Network Inference by Incorporating Rates of Transcriptional Changes.  
972 *Sci. Rep.* **7**, 17244 (2017).
- 973 54. Huynh-Thu, V. A., Irrthum, A., Wehenkel, L. & Geurts, P. Inferring Regulatory Networks  
974 from Expression Data Using Tree-Based Methods. *PLoS One* **5**, e12776 (2010).
- 975 55. Oh, E., Zhu, J. Y. & Wang, Z. Y. Interaction between BZR1 and PIF4 integrates  
976 brassinosteroid and environmental responses. *Nat. Cell Biol.* **14**, 802–809 (2012).
- 977 56. Nagel, D. H., Doherty, C. J., Pruneda-paz, J. L., Schmitz, R. J. & Ecker, J. R. Genome-  
978 wide identification of CCA1 targets uncovers an expanded clock network in Arabidopsis.  
979 doi:10.1073/pnas.1513609112
- 980 57. NAKAMURA, Y., KATO, T., YAMASHINO, T., MURAKAMI, M. & MIZUNO, T.  
981 Characterization of a Set of Phytochrome-Interacting Factor-Like bHLH Proteins in *Oryza*  
982 *sativa*. *Biosci. Biotechnol. Biochem.* **71**, 1183–1191 (2007).
- 983 58. Murakami, M., Tago, Y., Yamashino, T. & Mizuno, T. Characterization of the rice  
984 circadian clock-associated pseudo-response regulators in *Arabidopsis thaliana*. *Biosci.*  
985 *Biotechnol. Biochem.* **71**, 1107–1110 (2007).
- 986 59. Zhang, J. *et al.* Extensive sequence divergence between the reference genomes of two elite  
987 indica rice varieties Zhenshan 97 and Minghui 63. *Proc. Natl. Acad. Sci. U. S. A.* **113**,  
988 1611012113- (2016).
- 989 60. Heinz, S. *et al.* Simple Combinations of Lineage-Determining Transcription Factors Prime  
990 cis-Regulatory Elements Required for Macrophage and B Cell Identities. *Mol. Cell* **38**,  
991 576–589 (2010).
- 992 61. Mizuno, T., Takeuchi, A., Nomoto, Y., Nakamichi, N. & Yamashino, T. The LNK1 night  
993 light-inducible and clock-regulated gene is induced also in response to warm-night  
994 through the circadian clock nighttime repressor in *Arabidopsis thaliana*. *Plant Signal.*  
995 *Behav.* **9**, 1–8 (2014).
- 996 62. Gangappa, S. N. & Botto, J. F. The BBX family of plant transcription factors. *Trends*  
997 *Plant Sci.* **19**, 460–470 (2014).
- 998 63. Li, F. *et al.* The B-box family gene STO (BBX24) in *Arabidopsis thaliana* regulates  
999 flowering time in different pathways. *PLoS One* **9**, (2014).
- 1000 64. Crocco, C. D. *et al.* The transcriptional regulator BBX24 impairs della activity to promote  
1001 shade avoidance in *Arabidopsis thaliana*. *Nat. Commun.* **6**, (2015).

- 1002 65. McGoff, K. A. *et al.* The Local Edge Machine: Inference of dynamic models of gene  
1003 regulation. *Genome Biol.* **17**, 1–13 (2016).
- 1004 66. Davy, R., Esau, I., Chernokulsky, A., Outten, S. & Zilitinkevich, S. Diurnal asymmetry to  
1005 the observed global warming. *Int. J. Climatol.* **37**, 79–93 (2017).
- 1006 67. Li, H. *et al.* Different effects of night versus day high temperature on rice quality and  
1007 accumulation profiling of rice grain proteins during grain filling. *Plant Cell Rep.* **30**,  
1008 1641–1659 (2011).
- 1009 68. *IPCC, 2013 Working Group I Contribution to the IPCC Fifth Assessment Report Climate*  
1010 *Change 2013: The Physical Science Basis, Summary for Policymakers.* (2013).
- 1011 69. Shah, F. *et al.* Rice grain yield and component responses to near 2°C of warming. *F.*  
1012 *Crop. Res.* **157**, 98–110 (2014).
- 1013 70. Roberts, R. H. The Role of Night Temperature in Plant Performance. *Science (80-. ).* **98**,  
1014 265 (1943).
- 1015 71. Went, F. W. Plant Growth Under Controlled Conditions. III. Correlation Between Various  
1016 Physiological Processes and Growth in the Tomato Plant. *Am. J. Bot.* **31**, 597 (1944).
- 1017 72. Peters, D., Pendleton, J., Hageman, R. & Brown, C. Effect of Night Air Temperature on  
1018 Grain Yield of Corn, Wheat, and Soybeans. 61801 (1971).
- 1019 73. Frantz, J. M., Cometti, N. N. & Bugbee, B. Night temperature has a minimal effect on  
1020 respiration and growth in rapidly growing plants. *Ann. Bot.* **94**, 155–166 (2004).
- 1021 74. HUSSEY, G. Growth and Development in the Young Tomato. *J. Exp. Bot.* **16**, 373–385  
1022 (2007).
- 1023 75. Lobell, D. B. & Ortiz-Monasterio, J. I. Impacts of day versus night temperatures on spring  
1024 wheat yields: A comparison of empirical and CERES model predictions in three locations.  
1025 *Agron. J.* **99**, 469–477 (2007).
- 1026 76. Sunoj, V. S. J., Shroyer, K. J., Jagadish, S. V. K. & Prasad, P. V. V. Diurnal temperature  
1027 amplitude alters physiological and growth response of maize (*Zea mays* L.) during the  
1028 vegetative stage. *Environ. Exp. Bot.* **130**, 113–121 (2016).
- 1029 77. Mohammed, A. R. & Tarpley, L. Impact of high nighttime temperature on respiration,  
1030 membrane stability, antioxidant capacity, and yield of rice plants. *Crop Sci.* **49**, 313–322  
1031 (2009).
- 1032 78. Loka, D. A. & Oosterhuis, D. M. Effect of high night temperatures on cotton respiration,



- 1033 ATP levels and carbohydrate content. *Environ. Exp. Bot.* **68**, 258–263 (2010).
- 1034 79. Chi, Y. *et al.* Acclimation of Foliar Respiration and Photosynthesis in Response to  
1035 Experimental Warming in a Temperate Steppe in Northern China. *PLoS One* **8**, (2013).
- 1036 80. Djanaguiraman, M., Prasad, P. V. V & Schapaugh, W. T. High day- or nighttime  
1037 temperature alters leaf assimilation, reproductive success, and phosphatidic acid of pollen  
1038 grain in soybean [*Glycine max* (L.) Merr.]. *Crop Sci.* **53**, 1594–1604 (2013).
- 1039 81. Peraudeau, S. *et al.* Increase in night temperature in rice enhances respiration rate without  
1040 significant impact on biomass accumulation. *F. Crop. Res.* **171**, 67–78 (2015).
- 1041 82. Peraudeau, S. *et al.* Effect of carbohydrates and night temperature on night respiration in  
1042 rice. *J. Exp. Bot.* **66**, 3931–3944 (2015).
- 1043 83. Glaubitz, U., Erban, A., Kopka, J., Hinch, D. K. & Zuther, E. High night temperature  
1044 strongly impacts TCA cycle, amino acid and polyamine biosynthetic pathways in rice in a  
1045 sensitivity-dependent manner. *J. Exp. Bot.* **66**, 6385–6397 (2015).
- 1046 84. Impa, S. M. *et al.* Carbon balance and source-sink metabolic changes in winter wheat  
1047 exposed to high night-time temperature. *Plant. Cell Environ.* 1–14 (2018).  
1048 doi:10.1111/pce.13488
- 1049 85. Turnbull, M. H., Murthy, R. & Griffin, K. L. The relative impacts of daytime and night-  
1050 time warming on photosynthetic capacity in *Populus deltoides*. *Plant, Cell Environ.* **25**,  
1051 1729–1737 (2002).
- 1052 86. Prasad, P. V. V. V, Pisipati, S. R., Ristic, Z., Bukovnik, U. & Fritz, A. K. Impact of  
1053 nighttime temperature on physiology and growth of spring wheat. *Crop Sci.* **48**, 2372–  
1054 2380 (2008).
- 1055 87. Kanno, K., Mae, T. & Makino, A. High night temperature stimulates photosynthesis,  
1056 biomass production and growth during the vegetative stage of rice plants. *Soil Sci. Plant*  
1057 *Nutr.* **55**, 124–131 (2009).
- 1058 88. Prasad, P. V. V. & Djanaguiraman, M. High night temperature decreases leaf  
1059 photosynthesis and pollen function in grain sorghum. *Funct. Plant Biol.* **38**, 993 (2011).
- 1060 89. Marutani, Y., Yamauchi, Y., Kimura, Y., Mizutani, M. & Sugimoto, Y. Damage to  
1061 photosystem II due to heat stress without light-driven electron flow: Involvement of  
1062 enhanced introduction of reducing power into thylakoid membranes. *Planta* **236**, 753–761  
1063 (2012).

- 1064 90. Gent, M. P. N. Carbohydrate Level and Growth of Tomato Plants: II. The Effect of  
1065 Irradiance and Temperature. *Plant Physiol.* **81**, 1075–1079 (2008).
- 1066 91. Velez-Ramirez, A. I., van Ieperen, W., Vreugdenhil, D. & Millenaar, F. F. Plants under  
1067 continuous light. *Trends Plant Sci.* **16**, 310–318 (2011).
- 1068 92. Hillman, W. S. . Injury of Tomato Plants by Continuous Light and Unfavorable  
1069 Photoperiodic Cycles. *Am. J. Bot.* **43**, 89–96 (1956).
- 1070 93. Ohyama, K., Manabe, K., Omura, Y., Kozai, T. & Kubota, C. Potential use of a 24-hour  
1071 photoperiod (continuous light) with alternating air temperature for production of tomato  
1072 plug transplants in a closed system. *HortScience* **40**, 374–377 (2005).
- 1073 94. Matsuda, R., Ozawa, N. & Fujiwara, K. Leaf photosynthesis, plant growth, and  
1074 carbohydrate accumulation of tomato under different photoperiods and diurnal  
1075 temperature differences. *Sci. Hort. (Amsterdam)*. **170**, 150–158 (2014).
- 1076 95. Ikkonen, E. N., Shibaeva, T. G., Rosenqvist, E. & Ottosen, C. O. Daily temperature drop  
1077 prevents inhibition of photosynthesis in tomato plants under continuous light.  
1078 *Photosynthetica* **53**, 389–394 (2015).
- 1079 96. Michael, T. P. *et al.* Network Discovery Pipeline Elucidates Conserved Time-of-Day-  
1080 Specific cis-Regulatory Modules. *PLoS Genet.* **4**, e14–e14 (2008).
- 1081 97. Jaeger, P. A., Doherty, C. & Ideker, T. Modeling transcriptome dynamics in a complex  
1082 world. *Cell* **151**, 1161–1162 (2012).
- 1083 98. Matsuzaki, J., Kawahara, Y. & Izawa, T. Punctual transcriptional regulation by the rice  
1084 circadian clock under fluctuating field conditions. *Plant Cell* **27**, 633–48 (2015).
- 1085 99. Wilkins, O. *et al.* EGRINs (Environmental Gene Regulatory Influence Networks) in Rice  
1086 That Function in the Response to Water Deficit, High Temperature, and Agricultural  
1087 Environments. *Plant Cell* tpc.00158.2016 (2016). doi:10.1105/tpc.16.00158
- 1088 100. Yerushalmi, S. & Green, R. M. Evidence for the adaptive significance of circadian  
1089 rhythms. *Ecol. Lett.* **12**, 970–981 (2009).
- 1090 101. Yerushalmi, S., Yakir, E. & Green, R. M. Circadian clocks and adaptation in Arabidopsis.  
1091 *Mol. Ecol.* **20**, 1155–1165 (2011).
- 1092 102. Dakhiya, Y., Hussien, D., Fridman, E., Kiflawi, M. & Green, R. Correlations between  
1093 Circadian Rhythms and Growth in Challenging Environments. *Plant Physiol.* **173**, 1724–  
1094 1734 (2017).

- 1095 103. Choi, H. & Oh, E. PIF4 Integrates Multiple Environmental and Hormonal Signals for  
1096 Plant Growth Regulation in Arabidopsis. *Mol. Cells* **39**, 587–593 (2016).
- 1097 104. Press, M. O., Lanctot, A. & Queitsch, C. PIF4 and ELF3 act independently in Arabidopsis  
1098 thaliana thermoresponsive flowering. *PLoS One* **11**, 14–16 (2016).
- 1099 105. Paik, I., Kathare, P. K., Kim, J. Il & Huq, E. Expanding Roles of PIFs in Signal  
1100 Integration from Multiple Processes. *Mol. Plant* **10**, 1035–1046 (2017).
- 1101 106. Nusinow, D. A. *et al.* The ELF4-ELF3-LUX Complex Links the Circadian Clock to  
1102 Diurnal Control of Hypocotyl Growth. *Nature* **475**, 398–402 (2011).
- 1103 107. Zhu, J.-Y., Oh, E., Wang, T. & Wang, Z.-Y. TOC1–PIF4 interaction mediates the  
1104 circadian gating of thermoresponsive growth in Arabidopsis. *Nat. Commun.* **7**, 13692  
1105 (2016).
- 1106 108. Gray, W. M., Ostin, A., Sandberg, G., Romano, C. P. & Estelle, M. High temperature  
1107 promotes auxin-mediated hypocotyl elongation in Arabidopsis. *Proc. Natl. Acad. Sci. U.*  
1108 *S. A.* **95**, 7197–7202 (1998).
- 1109 109. Koini, M. A. *et al.* Report High Temperature-Mediated Adaptations in Plant Architecture  
1110 Require the bHLH Transcription Factor PIF4. *Curr. Biol.* **19**, 408–413 (2009).
- 1111 110. Liu, X. L., Covington, M. F., Fankhauser, C., Chory, J. & Wagner, D. R. ELF3 Encodes a  
1112 Circadian Clock – Regulated Nuclear Protein That Functions in an Arabidopsis PHYB  
1113 Signal Transduction Pathway. **13**, 1293–1304 (2001).
- 1114 111. Huang, H. *et al.* PCH1 integrates circadian and light- signaling pathways to control  
1115 photoperiod-responsive growth in Arabidopsis. 1–26 (2016). doi:10.7554/eLife.13292
- 1116 112. Raschke, A. *et al.* Natural variants of ELF3 affect thermomorphogenesis by  
1117 transcriptionally modulating PIF4 -dependent auxin response genes. *BMC Plant Biol.* **5**,  
1118 1–10 (2015).
- 1119 113. Ezer, D. *et al.* The evening complex coordinates environmental and endogenous signals in  
1120 Arabidopsis. *Nat. Plants* **3**, 17087 (2017).
- 1121 114. Yang, D., Seaton, D. D., Krahrmer, J. & Halliday, K. J. Photoreceptor effects on plant  
1122 biomass, resource allocation, and metabolic state. *Proc. Natl. Acad. Sci.* **113**, 7667–7672  
1123 (2016).
- 1124 115. Counce, P. A. *et al.* Rice milling quality, grain dimensions, and starch branching as  
1125 affected by high night temperatures. *Cereal Chem.* **82**, 645–648 (2005).

- 1126 116. Cooper, N. T. W., Siebenmorgen, T. J. & Counce, P. A. Effects of nighttime temperature  
1127 during kernel development on rice physicochemical properties. *Cereal Chem.* **85**, 276–282  
1128 (2008).
- 1129 117. Ambardekar, A. A., Siebenmorgen, T. J., Counce, P. A., Lanning, S. B. &  
1130 Mauromoustakos, A. Impact of field-scale nighttime air temperatures during kernel  
1131 development on rice milling quality. *F. Crop. Res.* **122**, 179–185 (2011).
- 1132 118. Lanning, S. B., Siebenmorgen, T. J., Counce, P. A., Ambardekar, A. A. &  
1133 Mauromoustakos, A. Extreme nighttime air temperatures in 2010 impact rice chalkiness  
1134 and milling quality. *F. Crop. Res.* **124**, 132–136 (2011).
- 1135 119. Shi, W. *et al.* Grain yield and quality responses of tropical hybrid rice to high night-time  
1136 temperature. *F. Crop. Res.* (2015). doi:10.1016/j.fcr.2015.10.006
- 1137 120. MURAKAMI, M., MATSUSHIKA, A., ASHIKARI, M., YAMASHINO, T. & MIZUNO,  
1138 T. Circadian-Associated Rice Pseudo Response Regulators ( *Os* PRRs): Insight into the  
1139 Control of Flowering Time. *Biosci. Biotechnol. Biochem.* **69**, 410–414 (2005).
- 1140 121. Salomé, P. A. & McClung, C. R. PSEUDO-RESPONSE REGULATOR 7 and 9 Are  
1141 Partially Redundant Genes Essential for the Temperature Responsiveness of the  
1142 Arabidopsis Circadian Clock. *Plant Cell Online* **17**, 791–803 (2005).
- 1143 122. Gao, H. *et al.* Ehd4 Encodes a Novel and Oryza-Genus-Specific Regulator of  
1144 Photoperiodic Flowering in Rice. *PLoS Genet.* **9**, (2013).
- 1145 123. Gaihre, Y. K. *et al.* Seasonal assessment of greenhouse gas emissions from irrigated  
1146 lowland rice fields under infrared warming. *Agric. Ecosyst. Environ.* **184**, 88–100 (2014).
- 1147 124. Lawas, L. M. F. *et al.* Combined drought and heat stress impact during flowering and  
1148 grain filling in contrasting rice cultivars grown under field conditions. *F. Crop. Res.* **229**,  
1149 66–77 (2018).
- 1150 125. Spring, C. *et al.* Analysis of differential gene expression and alternative splicing is  
1151 significantly influenced by choice of reference genome. *RNA* (2019).  
1152 doi:10.1261/rna.070227.118
- 1153 126. Robinson, M. D., McCarthy, D. J. & Smyth, G. K. edgeR: a Bioconductor package for  
1154 differential expression analysis of digital gene expression data. *Bioinformatics* **26**, 139–  
1155 140 (2010).
- 1156 127. Mockler, T. C. *et al.* The diurnal project: Diurnal and circadian expression profiling,

- 1157 model-based pattern matching, and promoter analysis. *Cold Spring Harb Symp Quant Biol*  
1158 **72**, 353–363 (2007).
- 1159 128. Priya, P. & Jain, M. RiceSRTFDB: A database of rice transcription factors containing  
1160 comprehensive expression, cis-regulatory element and mutant information to facilitate  
1161 gene function analysis. *Database* **2013**, 1–7 (2013).
- 1162 129. Shannon, P. *et al.* Cytoscape: a software environment for integrated models of  
1163 biomolecular interaction networks. *Genome Res* **13**, (2003).
- 1164  
1165  
1166

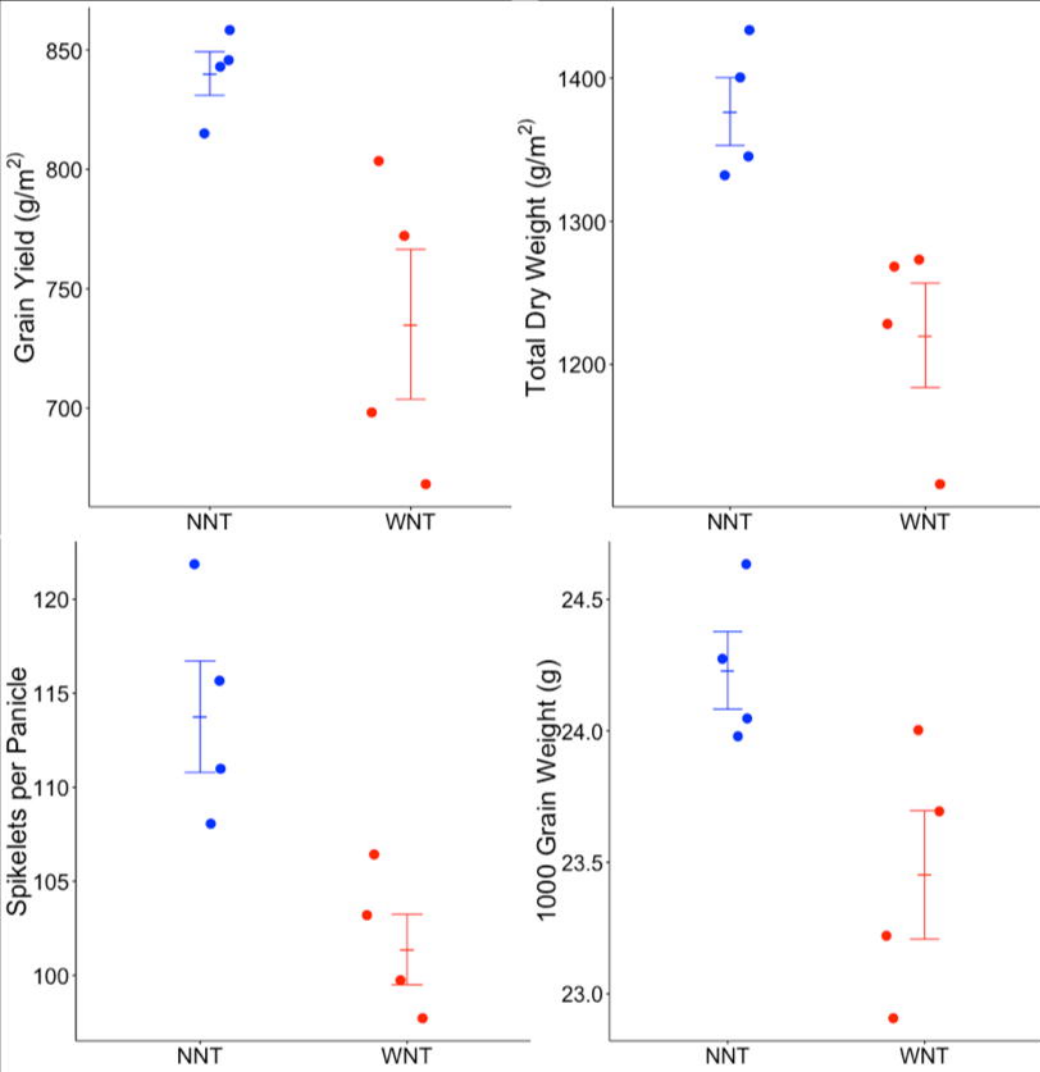

### A Differentially Upregulated Genes

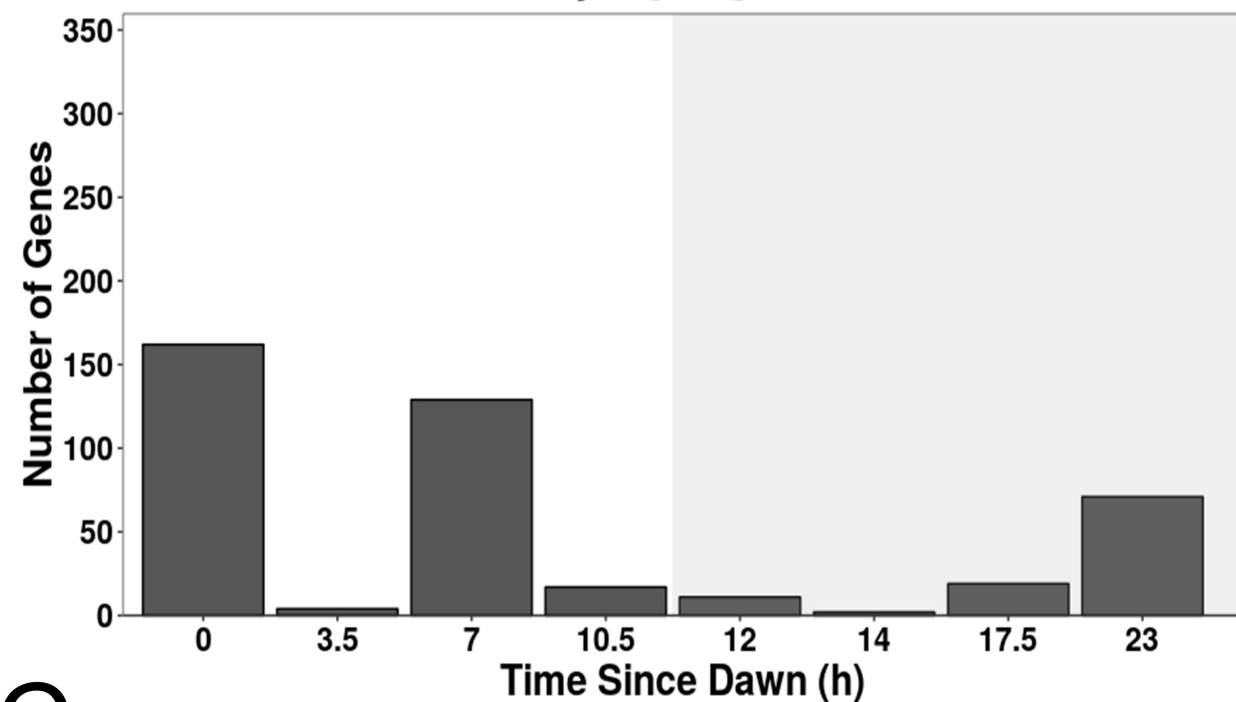

### B Differentially Downregulated Genes

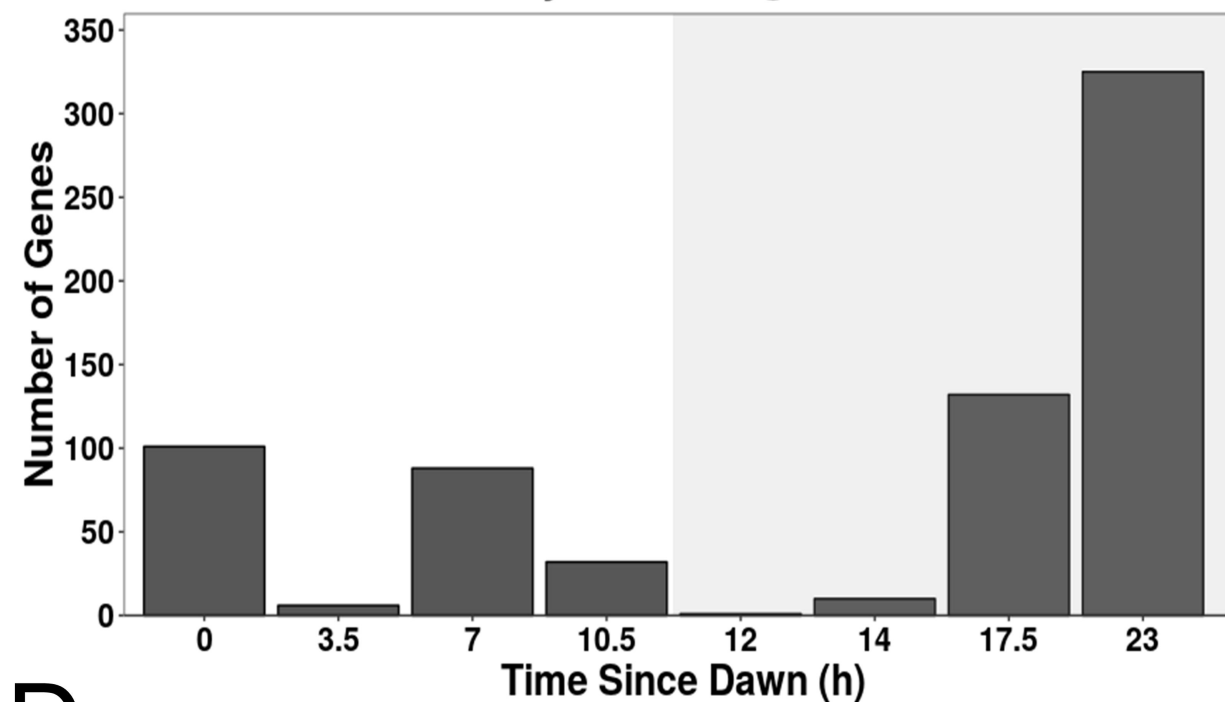

### C DE Upregulated Eigengene

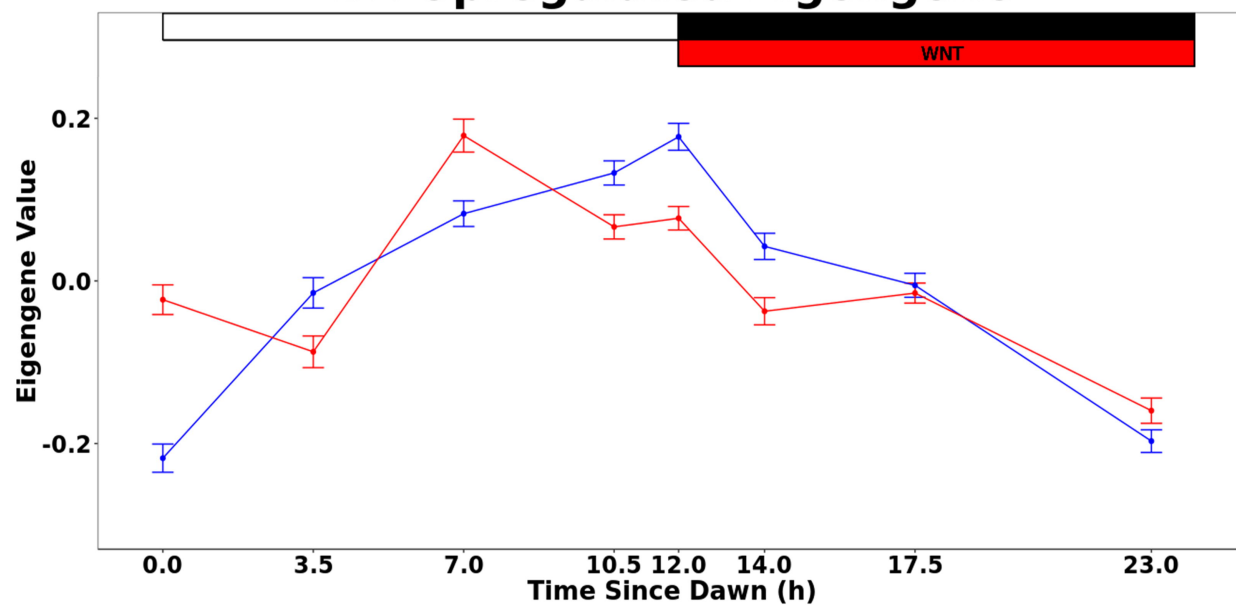

### D DE Downregulated Eigengene

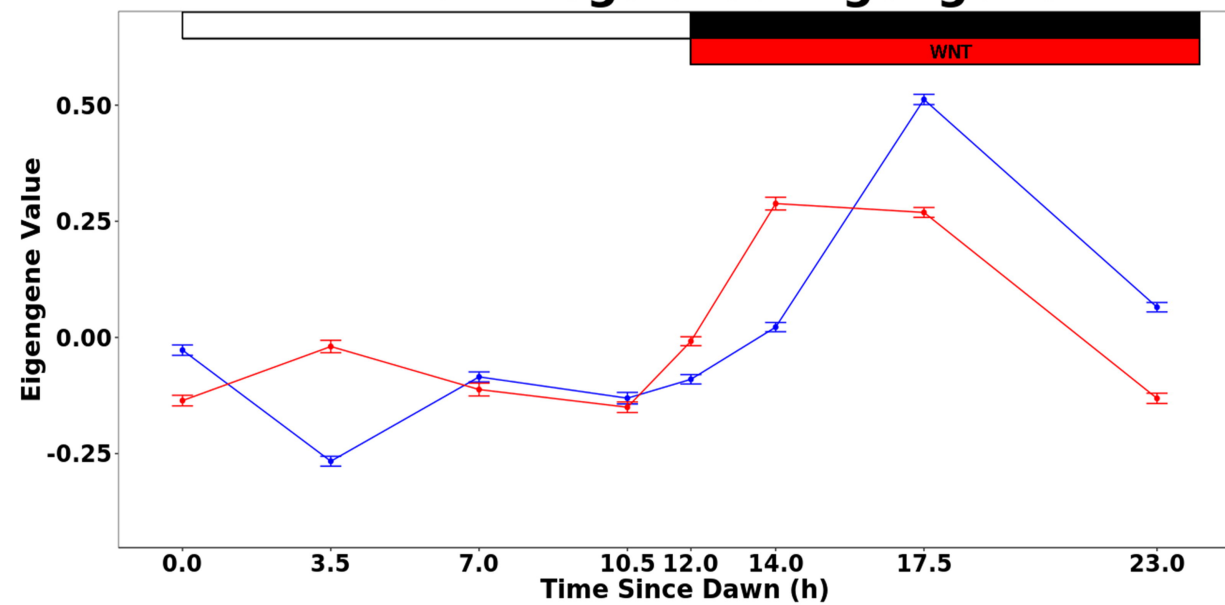

### Photo- and Thermocycles

**A**

| Phase        | Count | Expected Count | <i>p</i> -value |
|--------------|-------|----------------|-----------------|
| 0            | 11    | 11             | 5.59E-01        |
| 1            | 9     | 8              | 4.04E-01        |
| 2            | 10    | 5              | 5.06E-02        |
| 3            | 8     | 9              | 6.17E-01        |
| 4            | 9     | 8              | 4.73E-01        |
| 5            | 21    | 8              | 1.02E-04        |
| 6            | 8     | 5              | 1.06E-01        |
| 7            | 3     | 6              | 9.53E-01        |
| 8            | 13    | 12             | 3.91E-01        |
| 9            | 20    | 13             | 3.83E-02        |
| 10           | 20    | 14             | 6.38E-02        |
| 11           | 32    | 17             | 5.09E-04        |
| 12           | 23    | 11             | 1.28E-03        |
| 13           | 18    | 10             | 1.00E-02        |
| 14           | 6     | 5              | 3.34E-01        |
| 15           | 11    | 6              | 4.82E-02        |
| 16           | 10    | 8              | 2.68E-01        |
| 17           | 19    | 7              | 1.70E-04        |
| 18           | 8     | 5              | 1.71E-01        |
| 19           | 21    | 8              | 8.15E-05        |
| 20           | 26    | 13             | 8.22E-04        |
| 21           | 28    | 13             | 2.80E-04        |
| 22           | 17    | 12             | 9.72E-02        |
| 23           | 12    | 15             | 7.85E-01        |
| Non-Rhythmic | 233   | 367            | 2.93E-30        |

■ < 0.001  
■ < 0.01  
■ < 0.05  
■ Significantly Underrepresented

**B**

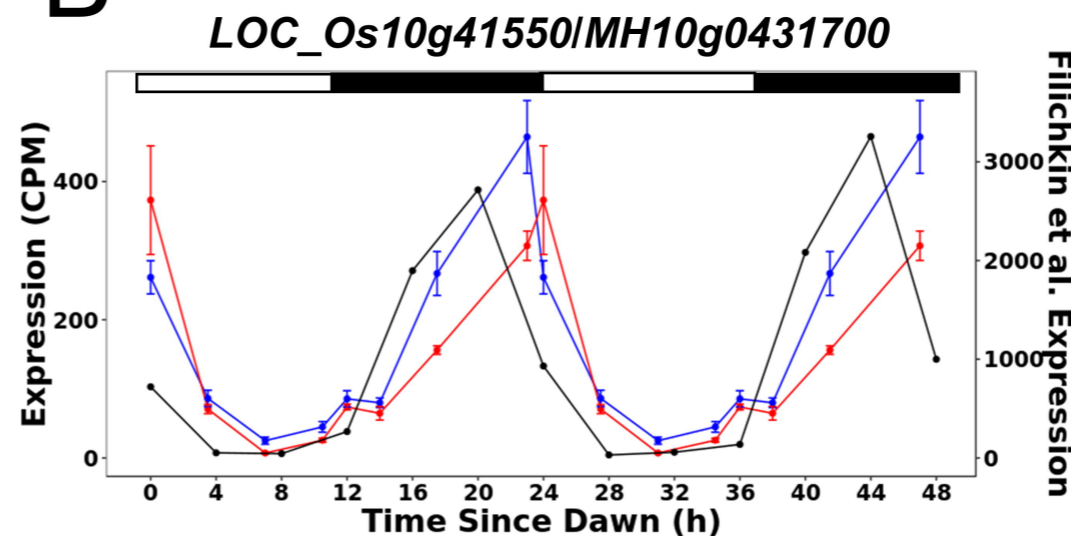

■ *LOC\_Os10g41550* Filichkin et al.  
■ *MH10g0431700* NNT  
■ *MH10g0431700* WNT

**C**

### Photocycles

| Phase        | Count | Expected Count | <i>p</i> -value |
|--------------|-------|----------------|-----------------|
| Rhythmic     | 363   | 229            | 0               |
| Non-Rhythmic | 233   | 367            | 1               |

**D**

### Thermocycles

| Phase        | Count | Expected Count | <i>p</i> -value |
|--------------|-------|----------------|-----------------|
| Rhythmic     | 311   | 189            | 0               |
| Non-Rhythmic | 285   | 391            | 1               |

■ Significantly Overrepresented  
■ Significantly Underrepresented

**E**

### Entrainment in Photo- and Thermocycles

| Phase        | Count | Expected Count | <i>p</i> -value |
|--------------|-------|----------------|-----------------|
| Rhythmic     | 134   | 102            | 0.02            |
| Non-Rhythmic | 462   | 494            | 0.98            |

**F**

### Entrainment in Thermocycles

| Phase        | Count | Expected Count | <i>p</i> -value |
|--------------|-------|----------------|-----------------|
| Rhythmic     | 96    | 55             | 0.01            |
| Non-Rhythmic | 500   | 527            | 0.99            |

**G**

### Entrainment in Photocycles

| Phase        | Count | Expected Count | <i>p</i> -value |
|--------------|-------|----------------|-----------------|
| Rhythmic     | 110   | 136            | 0.98            |
| Non-Rhythmic | 486   | 457            | 0.01            |



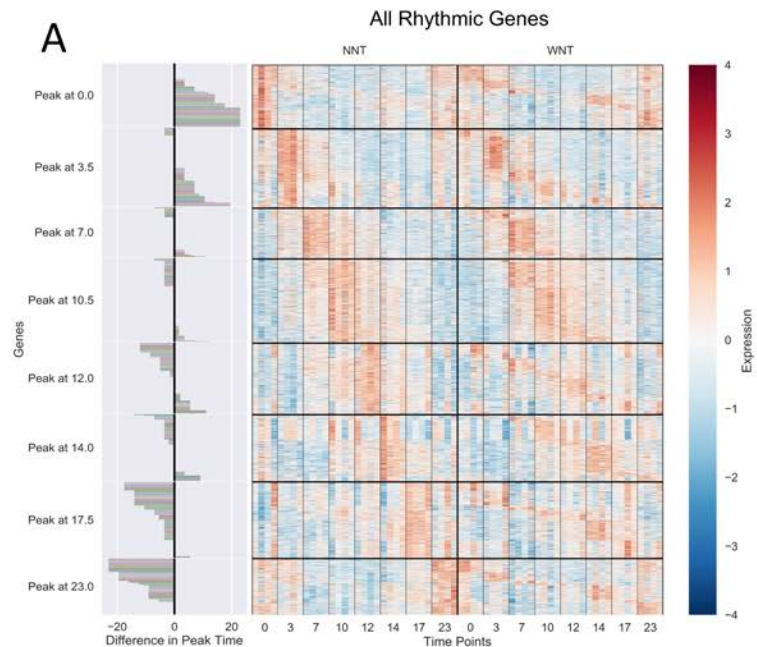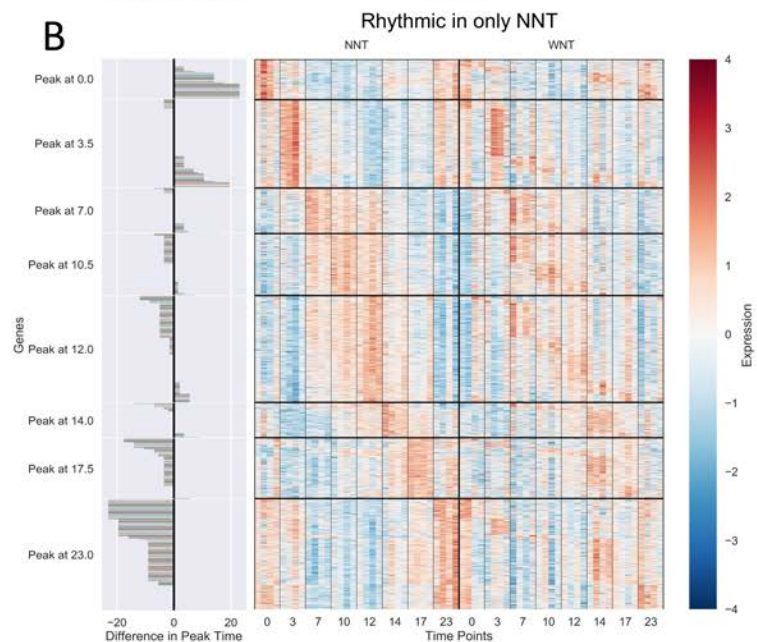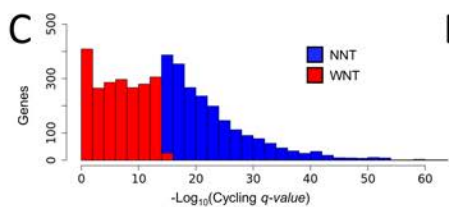

**D**

|           |                                                                  |
|-----------|------------------------------------------------------------------|
| NNT Ratio | $0.94 = \frac{\text{Dawn Phase (689)}}{\text{Dusk Phase (732)}}$ |
| WNT Ratio | $1.58 = \frac{\text{Dawn Phase (804)}}{\text{Dusk Phase (508)}}$ |

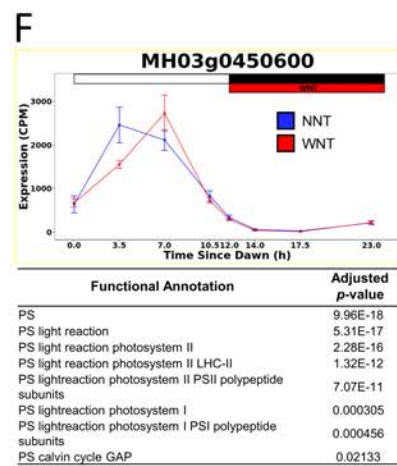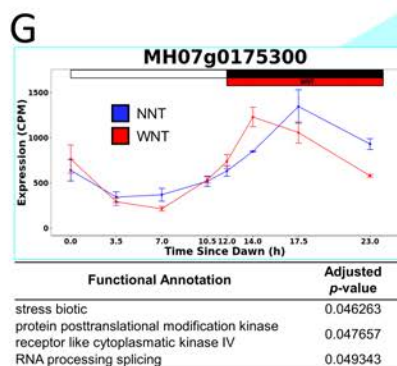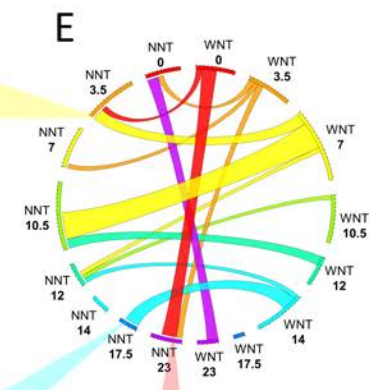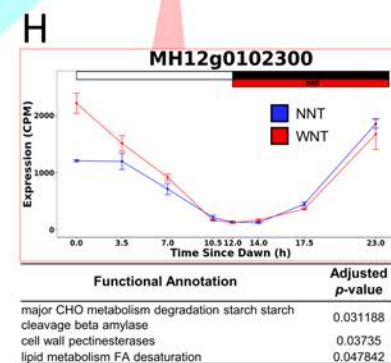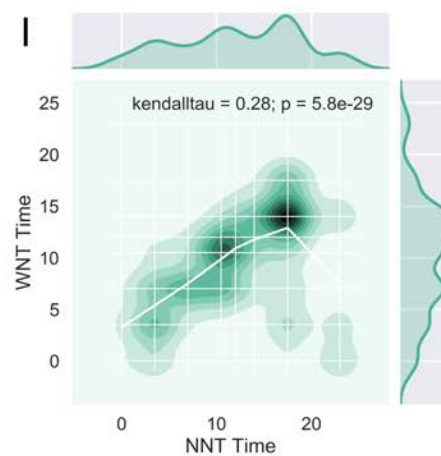

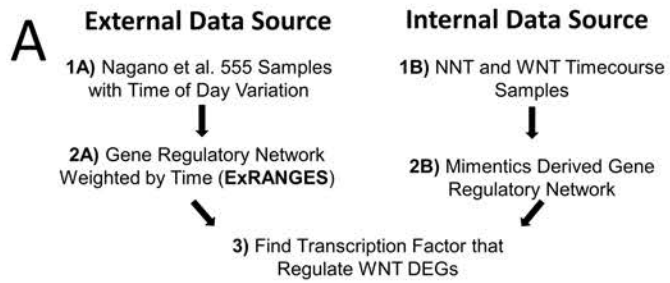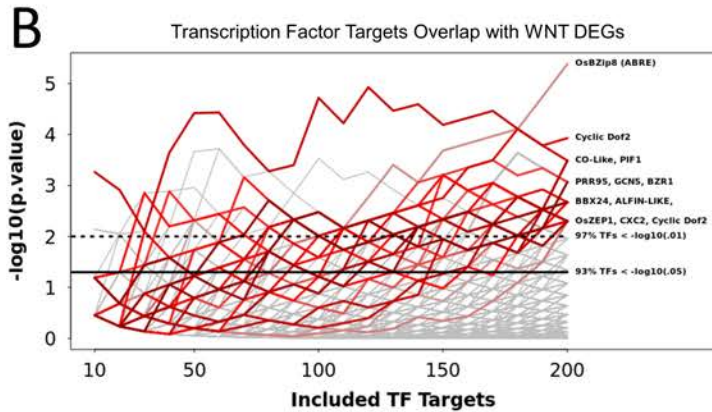

**C** Transcription Factor with Significantly Enriched WNT DEG as Targets

| TF            | Peak Exp (CPM) | Peak Exp Timepoint | JTK Q-value | Description                                       |
|---------------|----------------|--------------------|-------------|---------------------------------------------------|
| MH04t0504500* | 582.33         | 3.5                | 2.14E-109   | BBX24                                             |
| MH09t0440700  | 409.62         | 7                  | 2.19E-48    | Two-component response regulator-like PRR95       |
| MH04t0463500  | 359.24         | 7                  | 5.88E-83    | Zeaxanthin epoxidase OSZEP1                       |
| MH03t0017800  | 316.43         | 23                 | 6.19E-48    | CCCH-type zinc finger protein Ehd4                |
| MH03t0690900* | 269.91         | 3.5                | 1.42E-65    | PIF1 Phytochrome-interacting bHLH factors-LIKE    |
| MH09t0199300  | 245.30         | NA                 | 1.00E+00    | bZIP transcription factor OsbZIP71                |
| MH08t0029600  | 232.38         | Dawn <sup>^</sup>  | 3.25E-10    | Zinc finger CCCH domain-containing protein 54     |
| MH12t0389100* | 204.27         | 10.5               | 5.65E-16    | Ocs element-binding factor 1 BZIP                 |
| MH03t0074500  | 176.29         | 3.5                | 2.60E-73    | Cyclic dof factor 2                               |
| MH07t0089300  | 135.45         | 23                 | 8.02E-41    | TSO1-like CXC 2                                   |
| MH07t0542400  | 91.57          | 3.5                | 3.08E-54    | Cyclic dof factor 2                               |
| MH03t0731600  | 85.57          | NA                 | 1.27E-04    | PHD finger protein ALFIN-LIKE 3                   |
| MH08t0489700* | 81.00          | 14                 | 1.08E-48    | WRKY transcription factor OsWRKY30                |
| MH03t0093500  | 75.01          | NA                 | 1.00E-05    | Chitin-inducible gibberellin-responsive protein 2 |
| MH11t0062400  | 70.39          | NA                 | 2.66E-01    | Hypothetical protein                              |
| MH01t0115900  | 53.77          | 23                 | 1.41E-31    | BES1/BZR1 homolog protein 4                       |
| MH03t0080100  | 38.31          | Dawn <sup>^</sup>  | 1.50E-09    | GCN5-related N-acetyltransferase                  |
| MH04t0394400  | 35.69          | 3.5                | 1.00E+00    | ERF114                                            |
| MH02t0546000  | 32.35          | 3.5                | 1.58E-36    | Scarecrow-like protein 8                          |
| MH08t0380600* | 28.70          | NA                 | 1.55E-06    | WRKY transcription factor OsWRKY69                |
| MH02t0510500  | 24.14          | NA                 | 1.00E+00    | Homeobox-leucine zipper protein HOX24             |
| MH01t0514300* | 20.13          | Dawn               | 1.19E-24    | ABRE-binding factor OsBZip8                       |
| MH03t0099900  | 16.96          | NA                 | 1.00E+00    | Homeobox-leucine zipper protein HOX12             |
| MH03t0268900  | 12.26          | NA                 | 1.00E+00    | Heat stress transcription factor B-4d             |
| MH01t0528100  | 6.79           | NA                 | 1.00E+00    | NAC domain-containing protein 68                  |

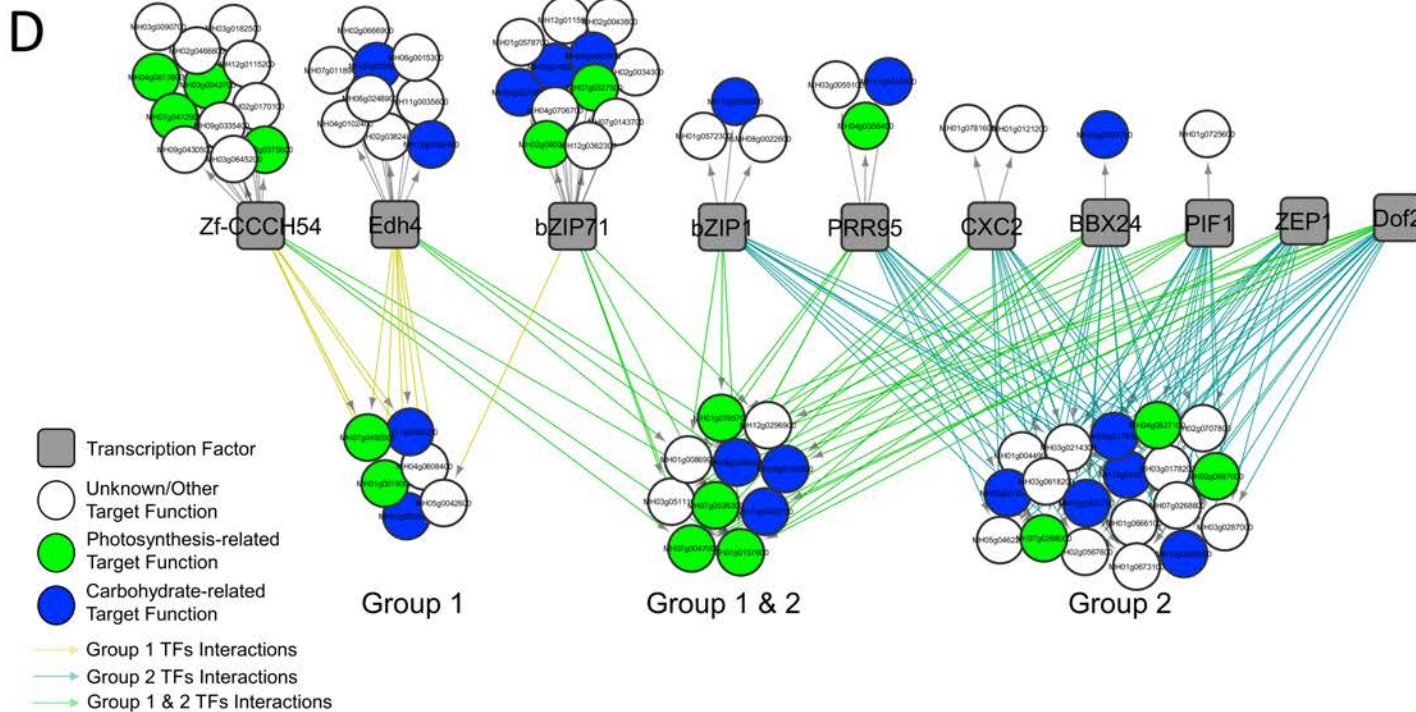

A

NNT

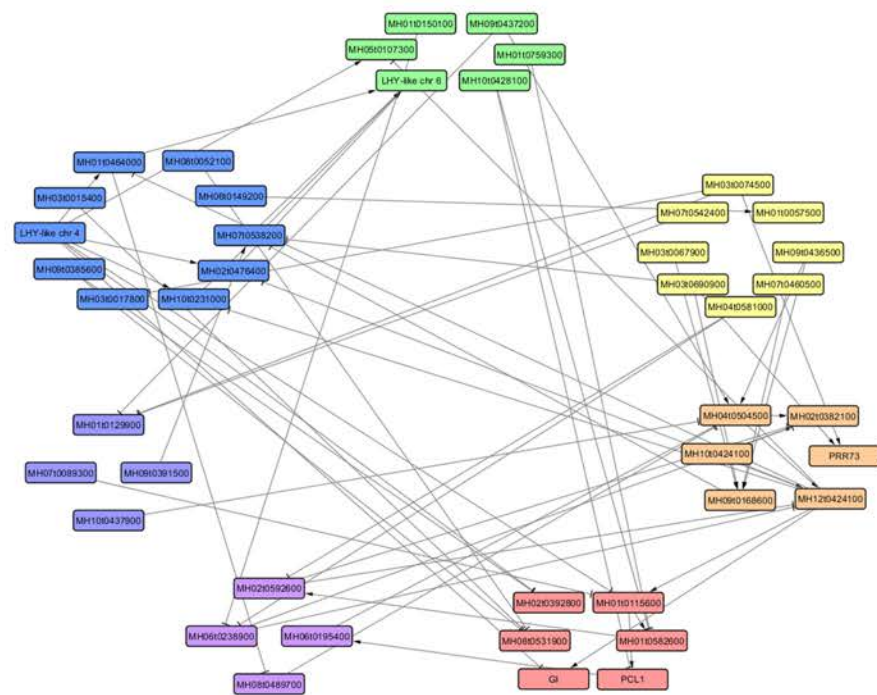

B

WNT

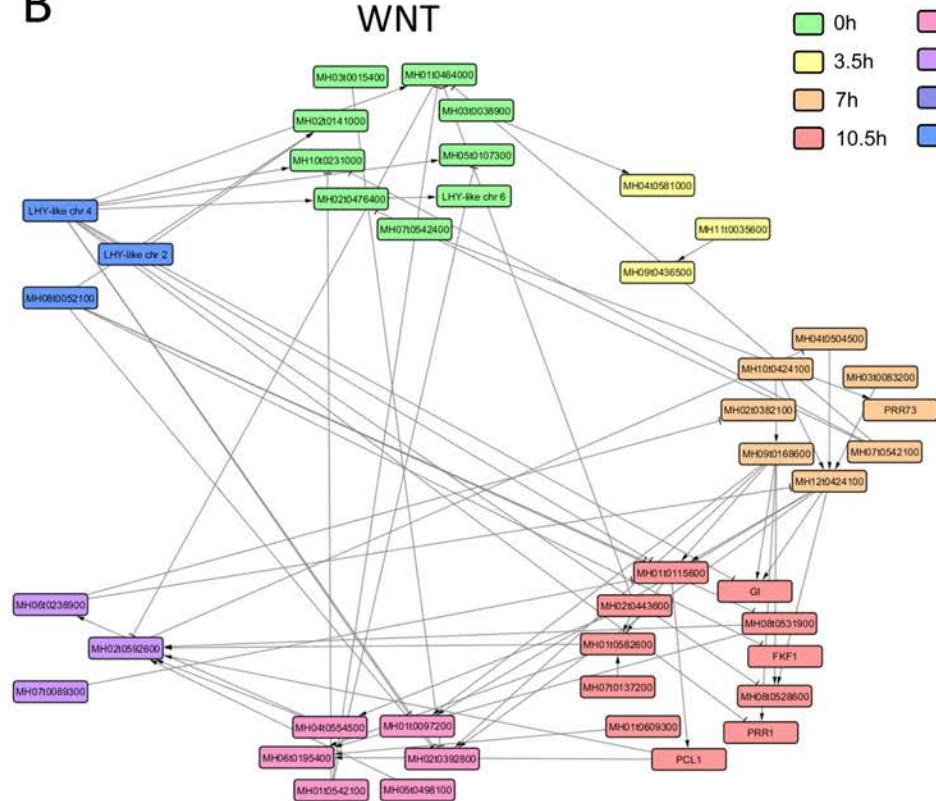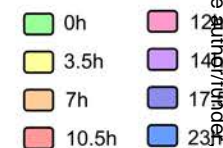

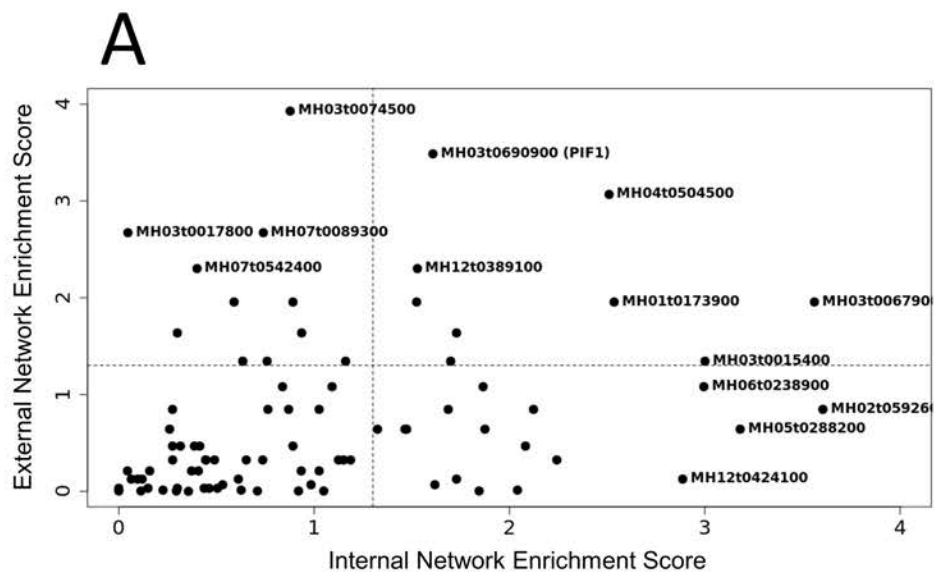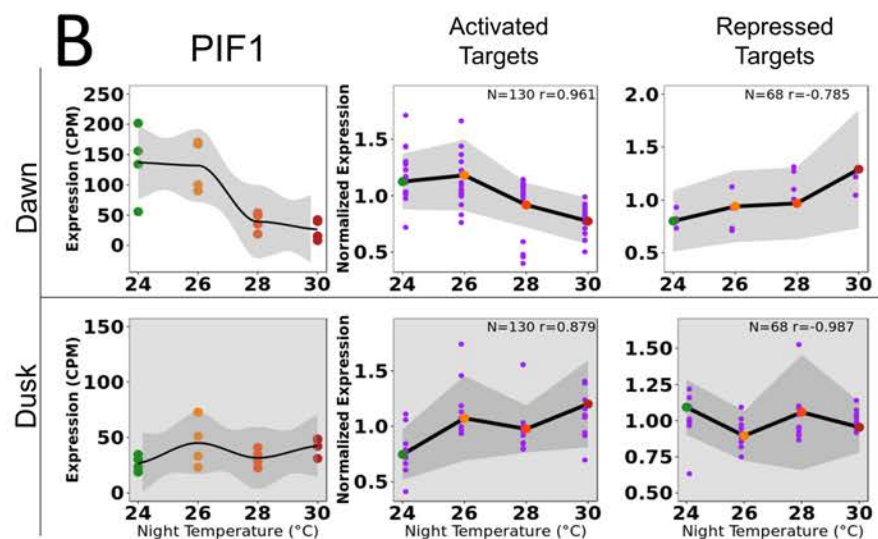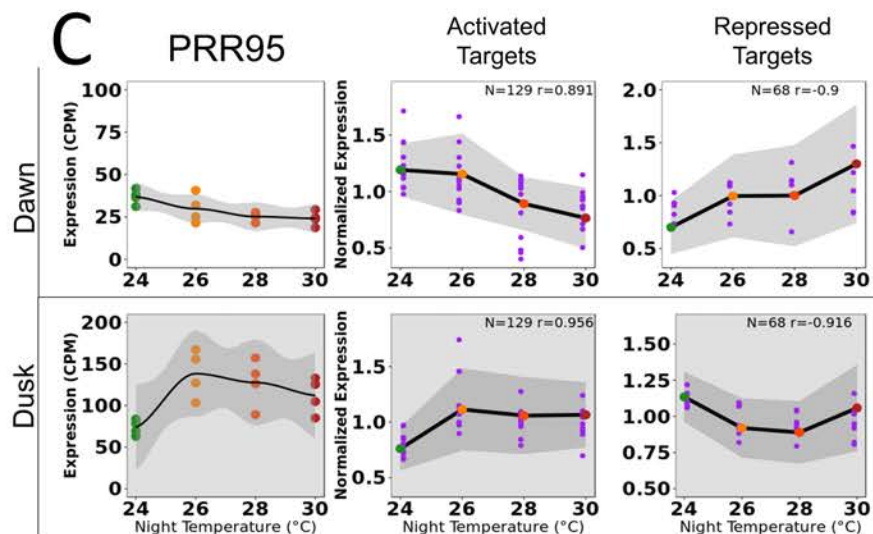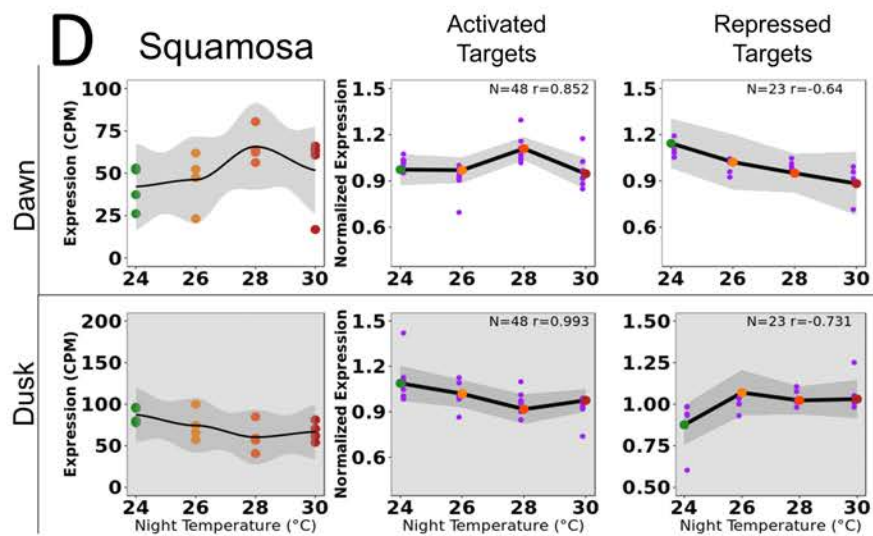

Source: https://www.biorxiv.org/content/10.1101/702183v1.full.pdf
